# Supplementary material
Source: PubMed Central journal article supplement (PMC2757864)
Supplement: 0907939106_ST2_PDF.pdf [file 0907939106_ST2_PDF.pdf]

**Table S2. Primers and probes used for qPCR**

| Gene      | Foward                   | Reverse                  | UPL probe |
|-----------|--------------------------|--------------------------|-----------|
| ABCA12    | cagaaagaaggcatgcatca     | ggggatttccaaatcagaact    | 48        |
| ABCA8     | ttggtcattttgttctatgtgtc  | ttcgaagatactgaacgcaaa    | 5         |
| ABCB11    | cagccctctcattgggatt      | tccgtaaactggacacactca    | 83        |
| ABCB4     | tgcgcttcagagatgtattct    | tgcagacagcttagctttagcat  | 50        |
| ABCC1     | actctctgggcatcaccac      | gcatgatccctgaagactgaa    | 55        |
| ABCC3     | tgctctccttcatcaatcca     | tggggttggagataaacctg     | 89        |
| ABCG1     | agagaaagcagttctcacagtttt | gaagctaaagctgccacctg     | 5         |
| ABHD1     | ctactgggcatgtgtgcttc     | ctccaggaaggccagaaact     | 83        |
| ABHD13    | ctgtccgcgagctgagat       | gctattagccatcttcaacaaagt | 89        |
| ADAM11    | cacctctctcctcgcaata      | tggtagtagcagtggtctccag   | 41        |
| ADAM15    | gctgaccctgtgtccaa        | gctggcccctgagacttc       | 64        |
| ADAM2     | tgtggaatgcaaagctgga      | ccaataagggcacaaatcctg    | 55        |
| ADAM20    | cctaaaggtcagccatgcac     | caagggtgtagggcactgct     | 36        |
| ADAM30    | aacaaagcaattgtctgcctct   | tgcggatgttcacatggat      | 13        |
| ADCY1     | atcaggctgaggctggacta     | accttctccatgtcctctcg     | 13        |
| ADCY6     | tcttggcctggcaactaac      | agaggaacagcagcacattg     | 9         |
| ADCY7     | ctgggcaacctcaccaag       | tcctccaggaacagctagg      | 59        |
| ADCYAP1R1 | gagctgatgggcttcaatg      | tccaacacgtgatgtgtcc      | 55        |
| ADIPOR2   | gggcattgcagccattat       | aggcccaaaaactcctg        | 14        |
| ADORA2B   | tacctggccatctgtgtcc      | gagtcaatccgatgccaaag     | 56        |
| ADORA3    | gggtcaagcttaccgtcaga     | atgacaccagccagcaaag      | 81        |
| AGPAT2    | agggtactcgcaacgacaat     | gtacaccacggggacgat       | 62        |
| AGPAT4    | gcacaagctctaccaggagaa    | gaagggtcccgtcctgtag      | 63        |
| AGTR1     | acagtccaaaggctccacag     | tcacctgggtcgaatttgtt     | 82        |
| AGTRAP    | atcgacgccataagcatgt      | atgctgatgtgcacgatgtc     | 49        |
| ALOX5AP   | gtctcgggggctactttg       | tgccctcacaacaagtacatca   | 18        |
| AMIGO1    | tgggctgagacacgtcct       | ggaaggccacaaggaagat      | 52        |
| AMIGO2    | gtgacagacacggacagacg     | tctttccaccggctcag        | 75        |
| ANKH      | catcgctgcgtgtatgt        | cggtggccgactcattctc      | 38        |
| ANO4      | tgactgggatttgatagactgg   | gctcaaactggggtcgtat      | 35        |
| ANO7      | gctctgtggtgatcgtggt      | ggcacggtacaggatgataga    | 49        |
| ANTXR1    | tgggtcctactgaggaaagg     | gacctgtggaagttgatgc      | 76        |
| ANTXR2    | atgaccgggttctttgatg      | gagatggaactcgggagaagt    | 12        |
| APOL1     | agtctctgccaggggaagat     | aagcagctccctccatgtc      | 25        |
| AQP4      | ggaaattgggaaaaccattg     | gacatactataaaggccaccag   | 17        |
| AQP6      | ccttgggatcaacgtggt       | agctgcagggtcagaagc       | 86        |
| AQP9      | gaacgcatttgcagatcaag     | tcaaaaatggcaaagacgatt    | 49        |
| AREG      | cggagaatgcaaatatagagcac  | caccgaaatattcttctgaca    | 38        |
| ARL6IP6   | tgctcttcgccattctctc      | caaattctcagcatgcaactct   | 69        |
| ARSE      | cctcttctgatcggggatt      | aacatgtgtctctctctactctc  | 12        |
| ATP11C    | cagcctgtccctgagattc      | cagatgcccttctacagctca    | 2         |
| ATP13A2   | accagcaagcctctacc        | ggtggacgtcgtcacaaga      | 75        |
| ATP13A5   | catcgggcttctgtcaac       | gtggctcccgttaaccaaac     | 55        |
| ATP1A4    | tgcgaatgtaccactcaag      | cgaagatgagaatactgtaggaat | 21        |
| ATP6AP1   | cctgctctgctgctcattc      | tgacctcatcgttgctgt       | 76        |
| ATP6V0C   | ttcgttttccgccgtcat       | ccactgggatgatggacttc     | 76        |
| ATP6V0E1  | ctcactgtgctctcattgtg     | caccaacatggtaatgataactcc | 45        |

|           |                            |                             |    |
|-----------|----------------------------|-----------------------------|----|
| ATP8B3    | aaggagctacgtgccaagg        | gctccatggtgaaaatctcc        | 25 |
| ATP9B     | ccatgtctcctatcgtgcag       | gagccatgtttccgcact          | 11 |
| BAI1      | gcaaaccaagttctgcaacat      | ctccagctcgaccactcatt        | 86 |
| BAI2      | ggccctgcaacaattcag         | gagcacaggctccaggac          | 52 |
| BAT5      | tgccctggagaaacatgc         | gagatggaccagaataactgaagc    | 89 |
| BMPR1B    | cgaatgtaataaagacctacacccta | gtgtatagggtccatcaacaaaatctc | 16 |
| BRI3      | cctgccaaactctatcgtggt      | aagggtgaagcagtcctccag       | 75 |
| BSG       | gtcgtgctagtctcctggaacc     | gacctctgtggcgctgtc          | 68 |
| BTN3A1    | tcagaggggaatgctaagagg      | caagtatggtgaccgaagaaga      | 6  |
| C10orf111 | gacagagttttgccctgttg       | tggagtgagccagggttcg         | 19 |
| C10orf57  | agagaagataaggaagatgagcaa   | gtgcctctatgcctgtgtga        | 43 |
| C11orf10  | ctctcatgggctttggagt        | tcagtgaagccatctggttg        | 4  |
| C13orf36  | aagtcgcgtgtcctgacc         | gcacaacaaaactgttttcaa       | 62 |
| C14orf147 | cctggaagcagatgtcctg        | caatggaaaccagcatgga         | 62 |
| C14orf165 | actaggaccccaccagaggt       | attccttccagaaaacacatactc    | 75 |
| C19orf12  | cggtctgaagcactctg          | tgtcatccaggcacctaaca        | 37 |
| C19orf15  | ggtcaatgtggtgggttca        | aatgaacactggcaccatca        | 38 |
| C19orf28  | cgtcaccaacgacatga          | caccacggtgaacgcata          | 39 |
| C19orf56  | aatgtaacccggccttg          | caagcacaccacttcagctt        | 3  |
| C1orf2    | tgctattgtctgctgatcc        | gtgggcctgagactgacc          | 7  |
| C20orf103 | ccacttcaaagacgcagtc        | tgaccaaggcagagagggtg        | 76 |
| C20orf54  | ctccatgttcctgcctaacag      | gtagcccccagcaggt            | 55 |
| C22orf32  | aagaaatggtgatgctctcagtt    | cttccccgagcctttctg          | 8  |
| C2orf28   | ggttctgatttctcctga         | cctggacattgggtgcat          | 20 |
| C3orf57   | ctaagccgcaggagataca        | tctcctctctgggtgctgt         | 14 |
| C4orf34   | tcaagtaaatcaagctgggtaac    | taggactgggactgccgtaa        | 29 |
| C5AR1     | ggagggacctcgcctc           | ggggtgtataattgaaggagtt      | 54 |
| C5orf28   | aaggattcatgactttgtaatggag  | gtgcagctctgacatcgaaa        | 55 |
| C6orf129  | aatctggcgctcgtcta          | ggctgtggagtctggagttc        | 85 |
| C6orf64   | aaagcggttcctggtatgg        | ccatggtgtctctgatgtgc        | 23 |
| C7orf42   | tgaattttgtcccagagaagg      | aaaaacaaggagctgtggaatta     | 41 |
| C9orf7    | acacagtggcggagaaggt        | tgatgacgatgggaacgac         | 29 |
| C9orf71   | ccgtggccacagtagacag        | ccacctcaaggctctctca         | 78 |
| CA14      | ggaatcttgggtgctgtct        | ccacactcttccggtttcc         | 2  |
| CACNA1C   | gaagctcagctccaacaggt       | ttacttcataggctctatcctga     | 27 |
| CACNA1G   | aaagagaaggagtaaggagaagca   | aagcgggagtagtcggagtag       | 41 |
| CACNG2    | accattccggattatgga         | ttgctgcacagaccttga          | 62 |
| CACNG8    | cgacagcgcggagatct          | cagcaggatggcgtaag           | 60 |
| CADM1     | gagftaacatgtaagccatcg      | cgactctacccaagttacca        | 45 |
| CADM2     | ggcatatctaccgttctgg        | gtcagctgcatcaagtcacc        | 9  |
| CADM3     | actcgacgagccatcag          | gccaccactgtttcatcaga        | 50 |
| CADM4     | tagtgggcatggtctggtg        | tggcttctgggtcagata          | 29 |
| CALHM2    | gaggccactggagagtcc         | gccttggctgggctgtag          | 57 |
| CATSPER1  | cgagaaaaagtttgggacat       | cagctgcaggtaatggaaca        | 18 |
| CATSPER3  | catcctcaagctatcggcta       | cagaggccacggtgtagact        | 37 |
| CATSPER4  | gggacaacagcaacgaataac      | agtggcagctgttcattctc        | 6  |
| CAV1      | acagcccagggaaacctc         | gatgggaacggtgtagagatg       | 42 |
| CCDC108   | aagaacagcggagtgggtgc       | cagagctccacgtcaatcc         | 12 |
| CCDC109B  | caggacctacaaatgaagataagg   | gctgaaatcatgttgccatct       | 46 |
| CCR5      | ctaagctcaaggcgtgagga       | cactccaacccaaatccac         | 12 |
| CCR9      | ttccccagacactgagagc        | catggtgggtcagtcagatg        | 40 |
| CD151     | ctcgcctgtacttcatcct        | ttctcctgagctccgtgtt         | 67 |

|          |                          |                          |    |
|----------|--------------------------|--------------------------|----|
| CD163    | ctggcgtgacatgttctgat     | ggctgcctccacctctaagt     | 50 |
| CD164    | cctccccctctacaactcca     | ccaggacaattctccaatg      | 71 |
| CD248    | ccactagacttgctctcagg     | tggtgtatccttggcacga      | 38 |
| CD27     | tccaaacccttcgctgac       | tgccctccagcatctcac       | 30 |
| CD274    | ggcatccaagatacaaaactcaa  | cagaagttccaatgctggatta   | 25 |
| CD276    | agctgtgaggaggagaatgc     | tgctgtcagagtgttcagagg    | 7  |
| CD300C   | agcgtgaccagaaaggaca      | gaagcggacattgctgaac      | 23 |
| CD300E   | gggaggtgttgacccaaaat     | aggaccacgagcaggaagt      | 66 |
| CD300LF  | gccaccacttgacaacag       | agcagcaatatgggaagatga    | 51 |
| CD320    | ctgcgacaggacttggga       | gggtacatggctcaatcctg     | 63 |
| CD37     | tggaatcctcatctccact      | tctacgacgtcccgaag        | 78 |
| CD40     | gctatggctcgtctgcctct     | cagtgggtggttctggatg      | 45 |
| CD44     | caacaacacaaatggctggt     | ggtgtctgtctttcatcttatt   | 40 |
| CD63     | tgaaatgtgtgaagttctgctc   | caatcagtcccactgcaca      | 18 |
| CD7      | ggcgggtatctccttct        | aattctatcccgccacga       | 23 |
| CD72     | ttctcacatgaggctca        | agcagcttttctgatgcattatc  | 56 |
| CD74     | agcaaaagcccactgacg       | agcagggatgtggctgac       | 72 |
| CD86     | ggaatgctgtgtgcttatg      | tggtactcagtcccatagtctgt  | 54 |
| CD8B     | caggccagagaccagaa        | gaaaccagcagaaccaggac     | 40 |
| CD9      | ctgctgttcggatttaactca    | gtcgaatcggagccatagtc     | 56 |
| CD97     | cgggaagagaccctcctg       | tcactctccagaaggcaca      | 17 |
| CD99     | gcttaccagaaaaagaagctatgc | attccgggtggctctccat      | 10 |
| CD99L2   | acttgctgatgctttggat      | ggctgtggtggtacatggt      | 69 |
| CDH10    | tgacactttgtatgaaaatgc    | agggtcatcttctactgcac     | 37 |
| CDH18    | ggagcctaatacgtattctct    | cgctcaggggtataaaaag      | 2  |
| CDH19    | tcgtgaaatcagtgcttgg      | gcacatacagtggtatcgaa     | 5  |
| CDH6     | tcacagcccaagatccaga      | tctgtccatactgtgtcgcgat   | 73 |
| CDIPT    | gctgctcgcgctcttaat       | ggccaggtgaccaacag        | 22 |
| CEACAM19 | caagacgccaagatggagat     | tccagaggaccaggattgag     | 15 |
| CEACAM3  | tgtgtttcctgctcctg        | tgctgctcctgagggtcac      | 89 |
| CELSR3   | gatcctcacaccatgtgc       | ctgctgtgggcagaact        | 8  |
| CHIC1    | tgaatttccctcgttctaaca    | cggccaatgctggttta        | 57 |
| CHIC2    | ttctgttaatgtacgttggctac  | ttctcaatcgatcttctgttc    | 5  |
| CHL1     | ccatcatgaaacaccaccag     | tgagaggctgaaccctatg      | 50 |
| CHRFAM7A | gtggtgacggtgatcgtg       | gcaccagttcagaaggatgac    | 77 |
| CHRM3    | gcagaaatcaccctctct       | tgccactaatcagaacacaa     | 24 |
| CHRNA1   | tggtattctacctgccacag     | cgatgaccagaaggaacaca     | 7  |
| CHRNA10  | gggcctctgctctgttt        | cacggaacagcttgagagc      | 24 |
| CHRNA3   | tgaagtggaaccctctgac      | ggaaatcccaacagcatt       | 43 |
| CHRNA6   | aaaccagatcatgaaaccaa     | ggatcccagcgcaatttat      | 5  |
| CHRNA9   | ggccatgactgtatttcagcta   | ggccatcgtggctatgtagt     | 87 |
| CHRNA3   | tcacctactcccctcgcac      | ggtgctgtaagtctgggactg    | 32 |
| CLCN4    | ctgcctccattagaccctca     | gcttgatgtgtgcagcttg      | 15 |
| CLCN7    | ggctctgtgattgtggcttt     | gcactgatctgggggatt       | 66 |
| CLDN1    | ccctatgaccccagtcaatg     | acctcccagaaggcagaga      | 66 |
| CLDN16   | tgctggagccacgttactaat    | cacatacacatcaacagcatacca | 21 |
| CLDN20   | cagtgctgctgtctctcaa      | gcagtagagaaccaaatacaaagc | 22 |
| CLDN23   | ttgcatcaatataatttgggttt  | agtttgcatggcaaggagtt     | 18 |
| CLDN9    | agtgggtcccctttgat        | cagggttcccaacacctct      | 44 |
| CLDND2   | aatgcaaccacggcatct       | catgcacgccacagtcac       | 89 |
| CLEC12B  | ttctcaagtcacagatctccagtc | aggacatggattacatctgtggt  | 34 |
| CLEC1B   | actcggaaaccagctctcg      | cagcagaatcaaagccatca     | 63 |

|          |                            |                            |    |
|----------|----------------------------|----------------------------|----|
| CLEC4F   | gcattacctttgaacccaac       | gataagctctgcatttctgc       | 9  |
| CLPTM1   | cagaagcggaccagaaat         | tgggagatcacctccacag        | 30 |
| CLPTM1L  | agcaccgtggtcatctttct       | tgcttcttcactttccaca        | 18 |
| CMTM1    | ggggaggtagccaacagc         | ctggccgtctgaaccagt         | 28 |
| CMTM3    | ctgtgctggcccatgat          | gatggagatagcaaagtagatgagg  | 4  |
| CMTM8    | aacaatgacctacaccaggattc    | aaggcactgccgttaaagc        | 37 |
| CNGA3    | ctggccaaatgcaacactaa       | tcgcatccttcttttcgct        | 63 |
| CNOT1    | ggactttcatcacagcttcca      | gtccaagagcaccagttccta      | 27 |
| CNTNAP4  | tgtctcaagacgctactctg       | gcagacacaagaggatcatcac     | 33 |
| COL17A1  | gctgtgaacactggcggtt        | gtcatcgctctgcacactg        | 70 |
| COL25A1  | gggacacagggaaagatgg        | ccctagaggacctatcaagc       | 2  |
| COX8C    | gactggagctgctgttact        | tatcgctcaggtgagacaa        | 56 |
| CPD      | aacaaatggagctagttggtataatg | caattgtttgtaaatagttccagtcc | 79 |
| CR2      | ggtgtccaactgtatcaaaa       | ggttcccgttaggggtcta        | 10 |
| CRHR1    | agctccgtctcgtcaagg         | tctcgcagtgtgtgtct          | 13 |
| CRLS1    | ccgaacttccaacaccac         | ccttgctgatgaatgttggt       | 59 |
| CSF1R    | tctggtcctatggcatcctc       | tgccaggttagggattca         | 14 |
| CSF3R    | gtccaagatcacaaaagctggt     | ccgcactcctccagacttc        | 18 |
| CSPG4    | gagaggcagctgagatcagaa      | tgagaatacagatgtctgcaggt    | 78 |
| CSPG5    | tgcgaccttctccaagfta        | tgtagtctcgtgttgac          | 22 |
| CUZD1    | tcagaattatctttctatgtccag   | gcagactgccctagcagag        | 67 |
| CX3CR1   | tctctgtaaagctgagcagga      | gggaactgatccatggtgaa       | 83 |
| CXADR    | atgaaaaggaagttcatcacgata   | aatgattactgccgatgtagctt    | 86 |
| CXCR6    | gcaaagcatctctgctggt        | gaacctatgtcttcatggtaatca   | 53 |
| CXCR7    | agaggctccttctgcagtg        | gcactttgcaacaactgtgag      | 71 |
| CXorf1   | ggtcaacctgtgtgcctg         | ttgaagggtcatttcttactca     | 67 |
| CYB561D1 | cttggcgttctgcctctg         | agggagtgtcaggtgagaaga      | 41 |
| CYBRD1   | aactggcaccagtgctc          | cggcagctctgtagacgatga      | 37 |
| CYYR1    | gggtctgtctccaagtt          | cactgagcaaggcaatcatc       | 15 |
| DAD1     | tggattttctcagattgacact     | agttgttctgacacacagtgaactc  | 2  |
| DAG1     | tccagtgagatatcatcaaggt     | tcccagtgagccaagat          | 12 |
| DKAKD    | gattcgcaaggagatgatgaa      | agcagggggatccagaat         | 69 |
| DDR2     | accttggctggactctcct        | agagcattctgggaatcagg       | 14 |
| DEGS2    | gcgacttcgagtggtctac        | ttgatggccgggtactg          | 28 |
| DLK1     | gacggggagctctgtgatag       | catagaggccatcgtccag        | 68 |
| DNAJC15  | agattcagatagagtgccagcat    | tggaatgaaccaagattgt        | 48 |
| ECE2     | tggaccaggtgttgatgag        | gagaggcacctgtaagacc        | 78 |
| ECEL1    | accggctgctgtacaagg         | agcccccttggtcaatg          | 64 |
| EDA      | ccaagggtcagcaattcaag       | tgatgcgagaccagtcattg       | 39 |
| EDA2R    | ccagcccttaacttaatgagg      | tgctgctgttggtatagga        | 61 |
| EDNRB    | cttggagtctggacatctgaaa     | ctgcatgctgtacctgct         | 21 |
| EFNB1    | ctggccaagaacctggag         | caagcccttcccactcag         | 1  |
| EGFR     | acacagaatctatacccaccagagt  | atcaactcccaaaccggtcac      | 50 |
| ELFN2    | agccagtgtaaggttaggg        | cagacaggagaggtggcaat       | 20 |
| ELOVL6   | gtttgaactgaggaagccattag    | cagttcgaagagcaccgaat       | 54 |
| EMP3     | tccgactccagctctgactt       | caccagcaagaggagtgaca       | 86 |
| EMR2     | tcatggcccactacgatgt        | cagccccatgtaggatgatg       | 63 |
| ENG      | cttctggagttccaacg          | ggtgccattttgcttggga        | 80 |
| ENTPD1   | tgagatgatgaaaagtctgtgc     | cctttactccagcgttaagatgtt   | 52 |
| EPGN     | ccgtgactgtaacacctcca       | ttcaaggctatgggtccttc       | 26 |
| EPHA10   | aaggaactggatgcgaaaag       | cagcacagctcccaaac          | 25 |
| EPHA2    | ccagtgctcagcatcaaccag      | acgctaagcaggtggtg          | 19 |

|          |                          |                         |    |
|----------|--------------------------|-------------------------|----|
| EPHA5    | tctgatccaccacaatgg       | ttcattaacattgagatggcatt | 68 |
| EPHA7    | gaggatgatccagaagctgtctat | gggtgctgccacctactgg     | 31 |
| EPHA8    | ccgctgtggtcaacatca       | cgctcttgacggatcacc      | 27 |
| EPHB2    | tgtctcagatgatgatggagga   | ccgcatcacctggatactgt    | 49 |
| EPHB3    | tgccaaggagtcccagtg       | aggtggtacggctgttg       | 16 |
| EPHB4    | ttggctccttcgagctg        | ctggacactggccaagattt    | 73 |
| ERBB2    | tgctgtcctgttcaccactc     | tcctcctcatcatcttcacattg | 67 |
| ERBB3    | cacaatgccgacctctcc       | cacgaggacatagcctgtca    | 86 |
| ERMAP    | ggccactggaagttggag       | tcctccccatgcagaga       | 32 |
| F2R      | taaccgccccagacacag       | ccctctctcctgactctgc     | 13 |
| F2RL2    | ttatctagttcaccttgccttctt | gctgaagtgagctatgatcagg  | 41 |
| F3       | cagcccggtagagtgtatgg     | ccacagctccaatgatgtagaa  | 2  |
| FAIM2    | ccctagctgggctatgtg       | gtggggaaaccgtgtcata     | 3  |
| FAIM3    | gccagctacaaccacca        | tgtgagccatagtccagtg     | 64 |
| FAM174B  | gactccacagtattcgacatcaa  | accaactttccacaggatgc    | 64 |
| FAM176B  | atcacgtcgcagggtgt        | gagcaactccatgtcccttc    | 24 |
| FAM38A   | tgaccttggtgccatgt        | cagcttctcttcacaaactgg   | 18 |
| FAM70B   | ctaccctctgcccttcag       | tgagggtcctcagacgaag     | 48 |
| FAT      | ccttctgacagcgactccat     | cagggatcaagatccaccac    | 33 |
| FCGR1A   | tggaagatcgcgtacac        | gcactggagctggaatagc     | 18 |
| FCGR1B   | cagctggaatccacagagg      | gccagaggttctccttccat    | 67 |
| FCGR3A   | agggggcttttgggagta       | ggttgacactgccaaacctt    | 9  |
| FCGRT    | ggaaacctggagtggaagg      | tgcaggtgaagcacggaaaa    | 3  |
| FCRL2    | tccagagcaagggtggaat      | gagacctgagggtaggaca     | 47 |
| FCRL5    | agatggtgacactgaaagtgc    | agcctctcagggcctcac      | 62 |
| FFAR3    | tggggtctcaagaagcagt      | gtgattgccggagaagtagg    | 77 |
| FGFR2    | cctgctggagacaggtaacag    | cgggggtgtggagtcat       | 17 |
| FGFR3    | gcctcctcggagtccttg       | cgaagaccaactgctcctg     | 29 |
| FIT1     | cacggcaacttctcaacataa    | caacacaaagccccctaaga    | 45 |
| FLJ20674 | caccgagctcctgttact       | tcctgatccatctgtgc       | 24 |
| FLJ22222 | aggaggggtgccaacaagac     | caagacatcatccggaaca     | 42 |
| FLJ35773 | agcaaggaacgaatggactg     | cagtccagggcaggttcc      | 73 |
| FLJ40235 | cacgatggaggcccaata       | tcctcgtgaaggcctgttc     | 47 |
| FLJ46321 | tattcgtcaccaccgaaa       | ttgaatgtcccaccttcc      | 21 |
| FLT3     | ctttaagcacagctccctgaa    | tgacctggaacaactcctc     | 5  |
| FLVCR1   | cccaaagagggtccacag       | ggtagcaaaaagccaactgc    | 61 |
| FMR1NB   | ggatgctcatgctctccatt     | tgcaagcaciaaatatgaggac  | 18 |
| FNDC3A   | tctgctgctactgtaaaaacgaa  | atttggggacatcattggaa    | 15 |
| FNDC3B   | cccacttggatgatggagat     | cacctggattaactgaacgaga  | 62 |
| FOLR1    | ttcctgagagtacagatttctc   | cctactacagccaccacact    | 68 |
| FPR3     | gtgtgggaagatggaacca      | agggagcacctcctcagttt    | 6  |
| FRAS1    | agcacaacacacctaacaacac   | cagttacctctggctgattgc   | 18 |
| FREM2    | gacatccgattccaacaggt     | ggtacatttgggtgtcaagc    | 66 |
| FRRS1    | tcattggagtatgggaacagc    | aatccattcccaggaacatc    | 59 |
| FXYD1    | agtcaaccagcagcagagg      | tcgctccaggtgttctacc     | 58 |
| FXYD3    | tcagcctggtgaaccaca       | gacaggaaggctggcatct     | 26 |
| FXYD5    | ttcaggtcccagacagag       | aggttgggggttgagagg      | 19 |
| FZD3     | acagcaaagtgagcagctacc    | ctgtaactgcagggcgtgta    | 75 |
| FZD7     | gccagcttgtgctaatagaa     | agccgggagaaactcacag     | 54 |
| GABBR1   | ggctcctggacagatatgga     | ggtcaataagacttggagcaga  | 28 |
| GABBR2   | aagaccttgaacactttgcac    | cccaaaagcggctgtgta      | 85 |
| GABRD    | acgggtggagaacaagctca     | ggccacagtggaggtgat      | 89 |

|         |                            |                             |    |
|---------|----------------------------|-----------------------------|----|
| GABRE   | tccagtcctcctagcatctt       | cacttatgattgagcacttctctg    | 65 |
| GABRG3  | aaaagatgctacgccagcaa       | tcaggggtggcatggctcag        | 9  |
| GALR2   | atggacatctgcacctcgt        | gtaggtcaggccgagaacc         | 38 |
| GDAP1L1 | gcccatggatgcctacac         | tgccattggctaaatgtctg        | 46 |
| GDPD2   | cagggaggcaacagaacg         | ccgagacattatccttatgcaa      | 57 |
| GDPD4   | ggcggagagagactgaaaaag      | cattcttactccactctgagtatctg  | 67 |
| GGT7    | acctgcagtccaacctcct        | tggttccaggaactcaatc         | 6  |
| GHSR    | accacaagcaaaccgtgaa        | aaatatcgccctacgtggaa        | 36 |
| GJA8    | ccgtgggacactcctgtat        | tgacggtaggagtgtcatt         | 25 |
| GJB1    | ttatctgctctaccctggctatg    | aggggtagacgtcgactt          | 28 |
| GJB4    | ttgtctgcaacaccaagca        | cggggaagaactcgcatag         | 43 |
| GJC3    | caagaaagcaaccgatagcc       | tctttgttttctctgggctaag      | 31 |
| GLP1R   | cagcgtccctgactgag          | caggcgtattcatcgaaggt        | 10 |
| GLP2R   | ttttcattcagttgacactgagc    | ttctccattggcaaaacat         | 49 |
| GNRHR   | cacgggtccttcatcagg         | gcaaatgcaaccgtcatttt        | 41 |
| GPBAR1  | caatacctgctcccaacagc       | ggcgtcatcttggctcctg         | 1  |
| GPBR    | gtgaaatccgcaaccatga        | ggaggtgtacctctgctgga        | 49 |
| GPM6A   | tgaccttcgtcagtttg          | tcaagaaattctcagagacagtacaaa | 55 |
| GPNMB   | aaaccaccccttcttagc         | tgccagtttcatcaggaatc        | 62 |
| GPR101  | ccagtcgctgtaacagcaac       | cagcttgcactggtagcac         | 82 |
| GPR107  | aactcgtgttccattccag        | aagaccagtgtggccgttt         | 17 |
| GPR123  | acacagaccagccaccgta        | ctccgctgacgaggtaaaac        | 27 |
| GPR128  | ggaattagactaccggcaagag     | acaccattgggttctggaat        | 20 |
| GPR142  | gacctccgaataaggccatc       | tccttacgcagacactgagc        | 67 |
| GPR148  | gccatgctcccatacctg         | atggtaaagatggcctggg         | 10 |
| GPR160  | ggaagatcatcagcaaggaaga     | gaagacctgctgaaatacacatga    | 55 |
| GPR171  | ccaacagctcatgcttctct       | cacattcaaaaccactcaaaa       | 45 |
| GPR172A | gggtgtcaaagagcttccag       | gggtcaccaccagcagac          | 21 |
| GPR175  | ctttggcacctgggagagta       | catcagggtagcaggtatcca       | 9  |
| GPR20   | catgcagagctgagagctga       | agacacagagggcatgacg         | 19 |
| GPR26   | cttcgctccctatgtgat         | ttgctgtacgccaagcac          | 56 |
| GPR34   | tcaggtgttagggaagcttg       | catgctcaaaattgcattaaagt     | 68 |
| GPR45   | cgctacgtggcacctt           | cacagcatgacgccaag           | 49 |
| GPR56   | ccgtcggaggaaaatgact        | gcgaaagtctccctgtgg          | 18 |
| GPR61   | tatggtgagacggtgacgag       | ctctgtaccgattgtccag         | 10 |
| GPR77   | gctctcagtgccgacctct        | gctgaaccgtagaccacca         | 72 |
| GPR78   | gctttgccccgtatgtca         | caccgccttctgttaggt          | 73 |
| GPR82   | cttccatggctttaccaatca      | tgtttcaaaaaacccaacaat       | 88 |
| GPR84   | tgctctttgggtgagttgaa       | acgatagcccagcacagact        | 2  |
| GPR88   | tttctggaccactgatgctg       | gcggtccatcctgacact          | 73 |
| GPRC5C  | ccagccggaaagtacgagt        | ccaaggctttgtggatgg          | 36 |
| GPSN2   | ggagattctggacgcaaaga       | cttgatctccgcaatgggtg        | 7  |
| GRAMD2  | ctccccgggacagtgatatga      | tcttctgtctggaaggctgt        | 73 |
| GRIA1   | ctacacgctccacgtgattg       | catcttattccagtaaccaatctt    | 89 |
| GRID2   | aaccctttccaagcagttca       | agggatcctgctgacgtg          | 81 |
| GRIK1   | caaagaggaaggaactgaaaaga    | tcagtgatattgctggactgtct     | 56 |
| GRIK2   | cacctccgaaaccgatt          | acattagagcagcatcagtcgt      | 42 |
| GRIN2B  | agcaatgggactgtctcacc       | aacatcatcaccatacgtcag       | 8  |
| GRIN2C  | ctcggtgcccaactcatc         | ccgctgaagcagctgtagat        | 4  |
| GRIN3A  | cagagatgcatgaatatatgagaagg | gcgctagtttctctggatcg        | 83 |
| GRIN3B  | catggctggggacaagac         | ggaagctcttctgtgtacgc        | 17 |
| GRM2    | attggcggttcctacagtga       | tgggatctgaaatagcctcaa       | 58 |

|          |                            |                           |    |
|----------|----------------------------|---------------------------|----|
| GRM4     | cacgtcaagaagtgcaccaa       | cgatcacaactgcacctc        | 15 |
| GRPR     | cccgtggaaggaatataca        | gcggtacaggtagatgacatga    | 36 |
| GSG1     | caccaccagccaagagaga        | cccagtgagtagcaagtctgttag  | 69 |
| GSG1L    | agcgataggagcatcagcat       | gaatgtacagcacctcggaga     | 5  |
| GYPC     | gacgagaagcccaacag          | tggtgtagtatgcattgtgg      | 13 |
| HAS2     | ctccgggaccacacagac         | tcaggatacatagaaacctctcaca | 73 |
| HCN2     | ctgatccgctacatccatca       | agattgcagatcctcatcacc     | 52 |
| HCRT2    | gtgctcgtgaccatcacct        | gacagacacagacaccgacac     | 5  |
| HEPACAM2 | gtgtatgaagtattcagcacatcc   | tgtactgttagcccatgaaagtt   | 3  |
| HIGD2A   | aggaaaagtctgtcgcaag        | ctgagagcgctggctgtt        | 12 |
| HLA-C    | atacctggagaacgggaagg       | tggcctcatggtcagagag       | 77 |
| HLA-DPA1 | ttggttctctgtgagtct         | tacaaacgcggcataagttg      | 17 |
| HLA-DPB1 | ttactgatggtgctgtcaca       | ccgtccctgaaaaggtaat       | 37 |
| HLA-DRA  | tcttcatcatcaagggattgc      | ttctcttaagaaacaccatcacct  | 84 |
| HLA-G    | ctggagaacgggaaggagat       | gggtggcctcatagtcaaag      | 77 |
| HM13     | cacactctggggctctacc        | ggacagcaggaggttgatgt      | 14 |
| HRASLS2  | tatgcacactgggcatcta        | ccagctccagcaatttact       | 36 |
| HRH2     | atgggaggggatgctactg        | gaacataaaccagcaccaccta    | 24 |
| HTR3A    | gccaccaagactgatgactg       | tcgggctcttctcgaagtc       | 5  |
| HTR3C    | ccttcacctcagttcttctc       | cacacctcctgtccatgc        | 56 |
| HTR4     | cattaatggatccacacatgtactaa | ggtctattgcagaagagcagga    | 78 |
| HTR6     | agcaggaaggccctgaag         | gagatgcagtcgcacacg        | 3  |
| HTR7     | gagagacctgagttgtgctgag     | acagataccgggtgcctctt      | 54 |
| IFI27    | ggtgaggtcagcttcacattc      | ggttaattccgtggcctaga      | 41 |
| IFI6     | ctgtgccatctatcagcag        | gggctccgtcactagacctt      | 41 |
| IFITM2   | gtgcctgacctatgctct         | cgccaaccatcttctgt         | 27 |
| IFITM3   | cccctcttagccctcagc         | tgaggcggaacaaattc         | 12 |
| IFNGR1   | catgcagggtgtgagcag         | aacattagttggtgtaggactga   | 57 |
| IGSF1    | gtggagctcgtggtgaca         | cccaggaaacaccacagg        | 76 |
| IGSF11   | gtgatttctgcatttccatctg     | ctgacacttccagggatgct      | 31 |
| IGSF2    | aaggcaactgaatccaaga        | ggtcaccacattccacacg       | 71 |
| IL12RB1  | gctgaggggtgtctggag         | gccaatcagaaacctgcact      | 45 |
| IL13RA1  | tctgatcctggcaagattt        | agatgtcgtacttctccagtgc    | 54 |
| IL17RE   | ctgctgtcaggtggctca         | ggaagacttttggatttctgc     | 10 |
| IL1RAP   | cctctcagctccaagaaa         | gggcaagagtgaggcttcta      | 40 |
| IL1RAPL1 | gccagcgttctcctcataa        | cacaaacatacaagcagcaa      | 67 |
| IL1RAPL2 | acaatctgaagatggtgtcaaag    | tgtctgagatccactgacca      | 46 |
| IL1RL2   | gctggagtgctcacagcata       | gcgataagccctcctatcaa      | 24 |
| IL23R    | ccatctctacagggcaccttac     | cgatcattccaataaaagtcc     | 82 |
| IL27RA   | ccccctccgagttacacc         | actgccacagtctgggtttt      | 21 |
| IL5RA    | tctgttaattctctcgcttatctgt  | ttgatattacttttgggtctgga   | 31 |
| ITGA11   | gaggctgacgtcctcttac        | gttgggcttgacctcgtagt      | 66 |
| ITGAL    | ccacagatggaagcattttg       | gtgttctggtcacacgttcg      | 26 |
| ITGAV    | catgtcctcctatacaattttactgg | gcagctacagaaaatccgaaa     | 46 |
| ITGB1    | cgatgccatcatgcaagt         | acaccagcagccgtgtaac       | 65 |
| ITPRIPL1 | tggacctggacacattagcc       | gcgcatctcctcactcattc      | 78 |
| KCNB2    | ggaatcccacagcccttt         | caggcatttccactgacaaa      | 40 |
| KCNE3    | ttcagtttgactgagtgatgtga    | caagattgggtgtctgcac       | 64 |
| KCNG3    | ggatgaccggagcaggta         | cctatgcagatagcttcaattatcc | 81 |
| KCNH1    | ggaggggagagagagtcagg       | agcagccggacaacttttag      | 66 |
| KCNH7    | tacggggaagtggaacaaag       | cagtggtcatttgggattca      | 1  |
| KCNJ11   | gagggccagttcaggtct         | cgagcctcctcaggtcac        | 69 |

|           |                           |                            |    |
|-----------|---------------------------|----------------------------|----|
| KCNJ12    | ccactcagcaccattacatagaa   | cgatgctgtaggggttg          | 1  |
| KCNJ13    | tgaccagcaaaagaactgag      | gacttaggagaggagcaataacttg  | 56 |
| KCNJ8     | cgctacccggagtctgag        | cagcttagccacctccctct       | 34 |
| KCNK13    | cacctgaacgaggacaacg       | cagcaggtagagcacgatga       | 84 |
| KCNK16    | aactctaccaaccccagcaa      | tgccaggttcccatatcct        | 74 |
| KCNK18    | cacacactggtccttctga       | ggggtagatgtagccatagcc      | 84 |
| KCNK9     | gccggaagtccgttagg         | gtgttcggcttggcagt          | 89 |
| KCNMB3    | cagggtgttgtaacctcagc      | ttggtggcacttaggtgtg        | 85 |
| KCNN2     | aaattcctgcaagctattcatca   | aaagtgttgcttggcattca       | 6  |
| KCNN4     | gcctgtgcactggagtc         | cggtctctctgccttgta         | 49 |
| KCNQ1     | ccacctcaacctcatggtg       | acagtgagggtcccaat          | 17 |
| KCNV1     | aaagtgggcagacattcc        | aaatatagagattcccacggatagaa | 68 |
| KCNV2     | ttcactaccatccccactc       | ctgggtacatgtctccgtagc      | 77 |
| KIAA0319L | gagcacctcagcaccatacc      | ggcagggttatctggacact       | 67 |
| KIAA1715  | tctgctggagcagctgtaac      | tgagctgcagttcgctga         | 85 |
| KIAA2013  | gcgagctgctcaagac          | tgtgggtgcagtgatcttct       | 17 |
| KIR2DL5A  | gaaccaagctccaaaactgg      | agcagcagcaatgaaggag        | 35 |
| KIRREL    | ccgatactttctccaaggtaa     | gagtagttgagcagcacacagg     | 36 |
| KIRREL2   | ttcacgaggtcctgaagaaga     | ttgtctccagagtccctc         | 27 |
| KLB       | accacggccatctacatgat      | cgatttcatctaaccttattgctg   | 30 |
| KLRC2     | tgatggccactgtgttaaaaa     | cgttctgtattcggggaaa        | 1  |
| KLRF1     | tgcccaaacatctcaactaca     | aataccattcacggttccaga      | 48 |
| LAPTM4A   | cacctatttgccaagaatcaaag   | aacaggaggcagctggagt        | 79 |
| LAPTM4B   | actccattcaggaatacatacgg   | atgacatcatctctgtagggaaaa   | 16 |
| LCT       | atgcaaaaatgaggcaagtc      | ttttggtcaatggtctgc         | 29 |
| LDLR      | gatgtcaatgggggcaac        | tcgttgatgatatctgtccaaaat   | 88 |
| LEPR      | gaaagcactttgcaattgagg     | tgggatgaatagatggaatatcag   | 68 |
| LGR5      | acctgaaagcccttcattca      | cagggtgtcacagggttga        | 60 |
| LHFPL5    | caacacggccacagtctataag    | cagccaatcattaggcctgt       | 71 |
| LIFR      | ttgcaagaccattatcaactcc    | tgtgcaatgcagtcagtcct       | 33 |
| LILRB4    | agggtcagccccacag          | ggaagaggaggaggagaga        | 58 |
| LMF1      | atgtggccatgtctggtg        | aggaagatcccaggaacc         | 33 |
| LNPEP     | ggagccctcaccaatgat        | ctggttctctcaaacatgc        | 24 |
| LPAR4     | tcttatcgaattttggagcctaat  | caatccaggggcacaaat         | 17 |
| LPAR5     | cctgtctggctaacctcgtc      | gccagcgtgctgtgtag          | 4  |
| LPCAT3    | accaggaaagataccaaacagc    | ggtagaaaaggcccagactca      | 15 |
| LPHN2     | gctcgggtgtgtagaaaa        | cccagcttcatcaaaacct        | 80 |
| LPPR2     | catcatcccctgcttct         | ggtaagcaagcaggatcacaa      | 3  |
| LRCH4     | gaggaaccagctcagtcgc       | agactgggattcgggagac        | 2  |
| LRIT3     | tctgacagctgccagttaat      | gcctgtcaagctcattatgga      | 6  |
| LRRC24    | aagtctcgcgcctcacag        | tgcacacatgatcttctctgc      | 20 |
| LRRC26    | ctgcgcaacctctcattg        | tgtcctgcaggctgagtg         | 1  |
| LRRC4     | aagacatgccaatctcacc       | tggttccctgacatctcca        | 19 |
| LRRC55    | ctgcagatcggtggaat         | cagccagctgagaatctgc        | 5  |
| LRRC59    | cctcagcgacctgaatgag       | gatggtggcctttggaag         | 17 |
| LRRN1     | gaagactttgtattttgactttgct | tgaaatatccaccctcctct       | 53 |
| LRRTM4    | gacagccgcactgtgtcat       | gctgcgtaattaaatggaacc      | 77 |
| LTBR      | ctgccccagagatgtca         | tggcaaggagcagaaagaa        | 59 |
| LY6K      | aaccaaggagggtgcaaat       | gcttcgcaacctgaaaaa         | 21 |
| M6PR      | cagtttcccacgacacgat       | tgccacagccaggagtagta       | 65 |
| MAG       | actgagtgccccaggaga        | gagaatagctcaggtccagctct    | 3  |
| MALL      | tgttggattttacaaaagatttga  | agtgggtcccgtggtacagg       | 80 |



|          |                             |                          |    |
|----------|-----------------------------|--------------------------|----|
| MAMDC4   | ccaacacatgcctctgtc          | agggctcctgcagtggtt       | 72 |
| MBOAT2   | tctggtgaaaaatggaaaagaaga    | gcttctgaacaaccgcagta     | 21 |
| MC1R     | actccgctgtctccaatgac        | agagctggcagcaaagatg      | 89 |
| MC3R     | actcggagagcaaaatggtc        | aggagcatcatggcgaag       | 9  |
| MC4R     | ttggaggaaataactgagacgac     | cagtgccccctgaattgat      | 79 |
| MCHR2    | tggttggcaacatcctcat         | agaaaaggcattccaactatgtg  | 5  |
| MCOLN3   | tgcttctgtggatggatcg         | gagaccatgttcagagaacgaa   | 57 |
| MFSD11   | cggcattggagaaatthtagg       | ctggatttctacaaaacgattg   | 40 |
| MFSD3    | tttgctctcacctacaagctg       | ccaactcgggagcagaaac      | 2  |
| MFSD8    | aacaggagccgctcttagg         | tgctctcagctctaaaatgtcc   | 38 |
| MICA     | ggcatcttccctttgac           | ggacagcaccgtgaggttat     | 24 |
| MMP14    | ctgtcaggaatgaggatctgaa      | aggggtcactggaatgctc      | 37 |
| MMP15    | acggctgthttgtcttttca        | gtcagcggctgtgggtag       | 1  |
| MPZ      | tatcctggctgtgctgctc         | tgtcgggtgaaaccacgatg     | 56 |
| MRC2     | aactccgggacagtctgg          | ttacagggactgtcgttcca     | 57 |
| MRGPRD   | ggcaacagcatggatgatct        | gatgcagaaggggtcctg       | 3  |
| MRGPRF   | atggctggaaactgctcct         | ccccggctgtagagtcc        | 37 |
| MRGPRX3  | tctgagatgtggggagtgc         | ttcaggagatgcctacaggag    | 70 |
| MS4A1    | aacaaaatctctactttgatggaactt | gcaaggcctactgctgagtt     | 60 |
| MS4A10   | gagctgcagctccaggtc          | tgtggcttctgctttcattg     | 42 |
| MS4A13   | cgaactccttgaacctg           | tgattttctttaaactttgggtga | 4  |
| MS4A3    | ccagtgactcagagctcacc        | tgagctttacgagcaggctta    | 2  |
| MS4A4A   | aaaaattaaaaggagagagattcagag | gttcattccttgcattggtt     | 74 |
| MS4A5    | atccattctggggctctgtt        | tctgtggttttcttttactgc    | 50 |
| MS4A7    | cctaccctcccacttcaat         | agggatccagtaatgcaaaa     | 31 |
| MST1R    | tgagtattgccctgattctctg      | ctgaagggtgggtcgcact      | 16 |
| MTUS1    | tgggatcgtacagcctttgt        | gacagcggcattaccagttt     | 48 |
| MUC16    | cagcactcctgggacctc          | ggccagcagccataattg       | 58 |
| MUC17    | ggggtgaacatcacaagcta        | gtgtgtactgtgtttaggaggac  | 22 |
| MUPCDH   | tcagtaccacggggctgt          | gatgatgggctggtgatg       | 73 |
| MXRA8    | ggaaagtcaaaggggaagga        | ccctctcctcaggatgtg       | 5  |
| NAALADL2 | ctaacacgtctttgcaaggtaaaa    | tggcttgaaggtcatcattg     | 1  |
| NCAM1    | agthttctctgcaggtggatattg    | tggcatctcctgccactt       | 20 |
| NCLN     | gtgagtgactggctgattgc        | tgacgatggtgggaaggt       | 23 |
| NCR1     | gactagagagcgagccagca        | aagagtctgtgtttcagccttc   | 8  |
| NCR2     | ccgtcagattctatctgggtgt      | gagtcagggggtctgtgt       | 13 |
| NDFIP2   | ttcatgtggcatttttcat         | aaatccgcagatagcaccat     | 11 |
| NEO1     | gcgaggaatgagaccaaaaa        | ggatgggcactaatcacagg     | 83 |
| NETO1    | gtaacgcacagacatgatcca       | cttggftgccccagacaa       | 88 |
| NINJ1    | accccagcagtaggacacc         | ctcacaggtatggcgactcc     | 27 |
| NKAIN1   | tcccgtacctcatcctgta         | aaatgcatccagccaacc       | 20 |
| NKAIN3   | gacgctgtcgtcctatct          | ctggaaaccaaggaagtcaaa    | 34 |
| NKAIN4   | tgtataggcgggacccat          | cccaggaagtcaaacacctg     | 15 |
| NKPD1    | gtctcatccgagccgtca          | tatcggggttaggggact       | 23 |
| NLGN1    | tgctgggggtcatgtgt           | tgagctattgctcgttgaaaaa   | 62 |
| NLGN4X   | ggacccaagagagtgacc          | tgaatgatggccttctgga      | 57 |
| NLGN4Y   | aagaacgacgtcatgctcagt       | tggttggtttggatcacca      | 9  |
| NMUR2    | ttgtggaggagtggagtgaa        | ataatgggggtgacagctgag    | 66 |
| NOX4     | gcttacctccgaggatcaca        | tctgctttatccaacaatctcc   | 2  |
| NOX5     | cgctgtgcccgttatc            | ccaattccagatacaacatgactg | 64 |
| NPAL2    | tggcagttcctgatctatgtga      | caccatagcttcatcttttc     | 2  |
| NPDC1    | gctctgtgtgccaggat           | aggaagtcaatctcatcttccagt | 23 |

|         |                            |                            |    |
|---------|----------------------------|----------------------------|----|
| NPFFR1  | ctggtgggcatctctgc          | ctcatctgcatgtggcatt        | 77 |
| NPFFR2  | acgttagtgcaattgctgtaga     | gtgagctttggttaaaagggtag    | 47 |
| NPY5R   | gaagaaaggattgattcaagaaagac | cactgctttatagtcacccaga     | 74 |
| NRCAM   | agtgacactgagtttatgggtgct   | tgcatgacctctggagtta        | 49 |
| NRG2    | ggcctactgcaagacaaaa        | acatgttctgccggaggt         | 38 |
| NRG4    | ggggcttggttatgtgatacct     | cctgtatagtttcaacgcacct     | 23 |
| NRM     | actgtatgtggcctgcaactg      | acacagggccttgggtat         | 9  |
| NT5E    | attgatgaacgcaacaatgg       | tccaaagggaatacagca         | 14 |
| NTRK3   | atgaggaacctgaggcca         | cggaaggcttattggattc        | 60 |
| NTSR1   | cctcatgttctgctacatctcg     | agtgcgttggcaccatgt         | 86 |
| NTSR2   | gcctggtagacataaagacg       | tacatgaccacgatggctct       | 75 |
| OPALIN  | tgggccctctctggatta         | tcacatggctctgcactttcct     | 49 |
| OPN1LW  | cgatcatcatgctctgct         | agactcttctgctgctttgc       | 5  |
| OPN1MW2 | ggctacaccgtctccctgt        | gcagaccaccatccatctct       | 54 |
| OPN4    | ggctcggagagtgagggtg        | gtagagggaccgccatt          | 16 |
| OPN5    | caaagaagtagctcatttcgacag   | tccagcacaatacaatcag        | 46 |
| OPRD1   | ttgcatgttcggcatcg          | aaggccaggtgaaagatgtaga     | 49 |
| OPRK1   | ccttgaaggcaaagatcatca      | tgcaaggagcactcaatgac       | 71 |
| OPRM1   | cggccaatacagtgatagaa       | gttagggcaacggagcagt        | 38 |
| OPRS1   | gctgaccaggctgctg           | ccactgcagctcctcagat        | 20 |
| OR10A2  | cctgagaaataacgaggtgaaga    | gagggctagggccttagaga       | 18 |
| OR10A3  | ccatgtacctgtcctcctga       | ttcaggcgtaatgactgcac       | 22 |
| OR10G7  | gcctgtgtctttcatttacc       | tgtagaaaacggccacaacc       | 1  |
| OR10G8  | cctgaaactggcctgtgc         | gccactattccaacagtcacaa     | 30 |
| OR10G9  | ccagcactattgtgtgatgc       | ccaatgtccacaaagatgacc      | 30 |
| OR10H4  | gtgactgtgccatctgtg         | caccatcatccccatgact        | 26 |
| OR10J1  | ttttgtaacctttggcatcac      | gccacatagcggtcataatcc      | 4  |
| OR10J5  | acctttgccacctgtgtctc       | gcttgaggtaggcaatggag       | 5  |
| OR10K1  | tgcttgggtatttgccttg        | tgcggtatgaggagactagga      | 6  |
| OR10K2  | cacctcattattgtcactgtccac   | tggtactgaggccttaagtagataaa | 76 |
| OR10P1  | gtacttctcctgcgccaac        | ggcacgatgtcagtgggtga       | 22 |
| OR10R2  | tggcttctggcctcttta         | gattgactttgtggcgctac       | 75 |
| OR10Z1  | gggaccaggctatctcctatg      | cccatgaggcagaaaagaac       | 44 |
| OR11A1  | acacctccattggggactct       | agagttcaaagagaatggctgaa    | 55 |
| OR11H1  | tctgtcctgaaagctatgttgg     | cacagtgataccacagccaaa      | 14 |
| OR11H12 | ggtttcactgtgagtgagaaa      | cctgttatagtcagtcataatgtt   | 35 |
| OR13D1  | aatcctcctgggaaatagcc       | gggagtatggaggcgagaat       | 9  |
| OR13G1  | gtaacatcagaaaatacatttcata  | tcagctcccagagaccatgt       | 33 |
| OR1C1   | cctgtcagtggtggtgtgt        | gggatgaagggtgaaataga       | 76 |
| OR1L4   | tggagacaaagaattatagcagca   | ggaagatggcaaagagagggt      | 88 |
| OR1L6   | ctacctgctggcctctatgg       | gcaatgccgtggtttcat         | 49 |
| OR1N2   | cacacgaactacaagggatgg      | aggaggaagtctgaaacagtgg     | 13 |
| OR2B3P  | ttctggctgttatgtccttga      | actacatagtgagggggtctgc     | 5  |
| OR2H1   | aattgcaaagacgaggttca       | tggtgcctctgacttctg         | 64 |
| OR2H2   | ctgtggtgtcctcactcct        | cattggagagtggagcttg        | 18 |
| OR2K2   | agaaacaaggaagcaaatgatgct   | ttcgtgtgtttagtcaatg        | 61 |
| OR2M7   | gtctggcagcaagtccatt        | cattcgagccaagcaat          | 76 |
| OR2S2   | cctgtgatgtacctctgat        | aggatgtcaccaggatgag        | 61 |
| OR2T11  | tgaccatgattggtctgagtt      | gccacgtagcagtcataaggc      | 79 |
| OR2T29  | cctcatgggactctcagaca       | gacaacgccttcaggaaaac       | 42 |
| OR2T35  | acgtcactctatgagaccctgat    | gaggatgtgcgtgtaggaca       | 40 |
| OR2T5   | ggccaacatcaccaggat         | tggtgtttggatcgtctga        | 47 |

|        |                            |                             |    |
|--------|----------------------------|-----------------------------|----|
| OR2T6  | tctatggggctgccttgat        | tcttgattgggggtggttaa        | 60 |
| OR2W3  | ccctcagaacagagaggtga       | gctctctctccccagaagc         | 48 |
| OR2Z1  | tgttgcaggctgttctaagc       | aggtggtgacagccttggt         | 82 |
| OR4C46 | ctcatagcttgaggcaagg        | agatgacaaccgtgatgtg         | 39 |
| OR4C6  | tctaaaggcggcaca            | aagaacaatacaaccaccgtga      | 24 |
| OR4F15 | atctgcactccccatgtat        | ggggctgtaattgagcaaaa        | 79 |
| OR4F17 | ggtatctgactcccacctca       | gacagagacagatcaatgagtgaga   | 4  |
| OR4K1  | agtggcctgatatacattgagc     | catcggacaccgatcaaaat        | 72 |
| OR4K17 | tcctcataaccattaagaaccactc  | tgagcagtcaaagtgaacg         | 61 |
| OR4S1  | cggaagtgtggcctgcta         | agggtctgcaggatggaat         | 79 |
| OR51G2 | gctccccagttctctcacat       | cacaggccaatttcatcactt       | 22 |
| OR51L1 | gcttgctgtgttatggttg        | ggatgaagaacagctgagca        | 50 |
| OR51M1 | cctcctcctgaaggcttttc       | ctggtgcaggcaaaatgag         | 55 |
| OR51Q1 | ggctatgtccgtgactgct        | gaggatggaggcataatgga        | 56 |
| OR51V1 | tcgagagatcagcttgattc       | gaaggacagaccatggatgaa       | 61 |
| OR52A4 | tcaaggcattgaatcaggagt      | tcagaggataacagatcgctaca     | 21 |
| OR52B4 | cctccatgaaccatgtacc        | cgtaggagaggacaatgtctg       | 6  |
| OR52D1 | ggacaatgctcttcatgcac       | agagccaggctctgtgagtgag      | 6  |
| OR52E4 | atcaatgacaccacttctatcc     | agtgtccagtcctggtattccta     | 69 |
| OR52E8 | tgagcagagtctccatgagc       | gctgtagacaagcccaggtc        | 72 |
| OR5AP2 | aggccatttcttcatggat        | actcagtccccaggaagga         | 44 |
| OR5AU1 | ctgtgcatcccactcact         | ggcgcaggtacataaaaag         | 34 |
| OR5C1  | ggcccaagatgctagtg          | acaggctgtgaaggatgg          | 74 |
| OR5F1  | tgaatattgtgggactctgc       | ccccgaatgcatagaaaa          | 55 |
| OR5K4  | acatcttctggcaacctg         | tctgggggtaacagcaca          | 18 |
| OR5L1  | ttgtttgcactgtgtggtc        | aaagcggatcataggccatc        | 4  |
| OR5M1  | taatcacactggcaggcaac       | tgcagggtgggaattggtc         | 18 |
| OR5P2  | tgtgtgcatagccgtctgc        | ctcagtgagcgcactctc          | 9  |
| OR5R1  | tgatgacctccccttctagc       | ccagcaaaggcaaatatcaga       | 15 |
| OR5T3  | gctggtgtgttggtcattg        | cactaagaaaataatacatgggggtg  | 72 |
| OR6B1  | ctccctggcgaagatctactt      | ttgatgacattgggaccaca        | 51 |
| OR6C3  | atctccacccttatgct          | tgatcaatgacgttgaagc         | 65 |
| OR6C68 | ggtttcatctagaattctgtgactct | tgtgtctgagcatggtatttca      | 76 |
| OR6S1  | ctcgtccctgtgcttgg          | cacagcaccctgcttacaga        | 76 |
| OR7A17 | ggggatgtattttgcagcag       | gagcaaaggatccccacaa         | 20 |
| OR7A5  | cagtcctatgtctgtctacctca    | gcaaaatacacaagatgttcaggtc   | 63 |
| OR7G2  | gaagcgagaaaccaaacagc       | ctgcagttccggatcctcta        | 2  |
| OR8B12 | ctcctttgttgggtgccta        | gttcattatgctcctgtgtgg       | 57 |
| OR8B3  | ttggcttgatcattctttcg       | tcattagcattttggagtgaa       | 82 |
| OR8D1  | cagctgtcctctgctgatt        | ttcaccagcattttgggagt        | 6  |
| OR8D2  | cccctaagatgctggtgaac       | tgcattccagaaaggagataatg     | 82 |
| OR8K5  | tgcacaggaaatagaattgtga     | caaaatcaacatgtaggacactaagac | 63 |
| OR9A2  | ttggtctttgatccctacga       | agaggctgacgggatcttg         | 22 |
| OR9A4  | tctacgtgaaaccaagcaa        | ccatcagggaaactaccaat        | 27 |
| OR9K2  | gccagagctccacattct         | ccctaagaaggatcatggcata      | 4  |
| OR9Q1  | acttcccagcctcctgaact       | caataaggaggaactcggta        | 53 |
| ORAI1  | ggacctcggctctgctct         | cggtgggtagtctgtggtc         | 22 |
| ORMDL3 | tcaccaacctcattcacaaca      | caaagggtgtcccctcac          | 4  |
| OXER1  | tgaaaaccccaggatgtgt        | aaagtgggatgattggcact        | 49 |
| P2RX4  | tctgtcaagacgtgtgagggt      | agtgaagtttctgcagccttta      | 88 |
| P2RY11 | gggaactgggtagcagacac       | agttggcagggcaggact          | 73 |
| P2RY13 | ttgaaaatcatgaagggtt        | ttgcatcactgtggtgtca         | 47 |

|          |                         |                            |    |
|----------|-------------------------|----------------------------|----|
| P2RY2    | agtgaggaacccgtgcag      | cctccaagctctggaacct        | 80 |
| P2RY6    | gcgaggcacttgtaactct     | gtgccattgtcccattcc         | 44 |
| PANX3    | gctgatgtccctggcatt      | gagaagcagctgatcggaga       | 82 |
| PAQR4    | cgaactgggcaacatctaca    | catggctattggcaccag         | 3  |
| PAQR7    | ctttgccctgctgtgtgat     | aggaggtggctgagtttctg       | 76 |
| PARL     | gagctcactgcggtcctaac    | cgcatTTTTgtgaataaagaagt    | 17 |
| PCDH12   | ggaggagctcactgtggatt    | ctgatgcagcaaggacagc        | 14 |
| PCDH21   | tcaagattgacatcacagatgct | ttgtccttggtctgtatcagga     | 46 |
| PCDH9    | tggaacaaatcattcctaactgc | tctcatcactatttggagacagc    | 48 |
| PCDHB1   | ttttatgcccacttcccttt    | gagccagcctccattttatc       | 59 |
| PCDHB11  | cgggagttttgtaggcaatc    | cgtgaggacagttctctcacct     | 45 |
| PCDHB12  | gggctctgaaactgggaac     | cctacaaagctcccgtct         | 9  |
| PCDHB13  | ggatgccaaaggaggac       | ccagtatctgaggctgtggttatt   | 55 |
| PCDHB14  | cctagaccaagactctggagaca | gggaggttatctgaatagagcaa    | 88 |
| PCDHB3   | cttgctctctttgttttctgg   | gccacagaatagcgtcttga       | 20 |
| PCDHB6   | ccaacccttcgaaataaacg    | aaatccaaagcctttctcagc      | 2  |
| PCDHB7   | agattccgggaacaatgga     | ttcaggatgaaggggacatc       | 58 |
| PCDHB9   | tacgcattgtggcttggat     | ggagcctgggtctcatacag       | 61 |
| PDCD1LG2 | gagctgtggcaagtcctcat    | gcaattccaggctcaacatt       | 69 |
| PDE3A    | aaagacaagctgtattccaaa   | gtggaagaaactcgttcaaca      | 79 |
| PDPN     | aaatgtcggaaggactctg     | agggcacagagtcagaaacg       | 74 |
| PERLD1   | cacaaagtgcctcagttcca    | cggtcttgaaagaacagga        | 7  |
| PGAP1    | ggggttgattatcatgaaag    | tgatagtctgaagtctaattgtag   | 74 |
| PGRMC2   | tcgagaatgggaaatgcag     | ttgtgatccttggtatcttctca    | 2  |
| PIGP     | ttgtctaaagccccaggaaa    | taaaggccacacagggtaa        | 31 |
| PIGX     | tgagttggcttattacgagag   | cctctatatcaaaatttctgaaacca | 34 |
| PKDREJ   | ttgggagtgtagtgtagcatctg | atcagtcaggaatcccaca        | 18 |
| PLA2R1   | gccggtgcagtacacaca      | gcaacacagccaccactgta       | 28 |
| PLXDC1   | agtggatggactatggctgtg   | tcctcatcctggaagtctc        | 13 |
| PLXNA1   | cagtgtatggctgtgtcg      | ctcacgggagttcctcca         | 68 |
| PMP22    | cctcaggaatgtccaccac     | tggtggcctggacagact         | 9  |
| PMP22CD  | tgttgccctgctcttgg       | ggtgaattcataccaggatt       | 69 |
| PPAP2C   | cggcagcaggaagtctgt      | gcgtcaggatagcgaagg         | 58 |
| PPYR1    | caccctgtaagccgcaag      | cctccaccaggagatgtagt       | 72 |
| PROM1    | tccacagaaattacctacattgg | cagcagagagcagatgacca       | 83 |
| PRPH2    | tcctcattggctcttcgag     | gattcctcggggtggac          | 42 |
| PRTG     | aaaagctcatctgcttatcaa   | gaggtgggatgaaatctg         | 39 |
| PSEN2    | ggcgccatctctgtgtatg     | gggcagtttctaccagcatt       | 76 |
| PSENEN   | ttcctgtcccagcctacac     | agctgagcgcagacatag         | 21 |
| PTCH1    | tctggagcagattccaagg     | accagtttaataagagtctctgaaa  | 5  |
| PTDSS1   | taccactgggcaagcttca     | gcagaacagctcttctgatctc     | 77 |
| PTDSS2   | ccatttccagacctcatcc     | gagaaacagctcgtagaccaca     | 21 |
| PTGER1   | atgggtggtgctgcatct      | cgctgcagggaggtagag         | 28 |
| PTGES    | cgctgctggctcatcaaga     | cggtgctcagggcatcct         | 49 |
| PTGFR    | aaggcagatctcatcattgg    | tttctttccattcaaaattattc    | 17 |
| PTK7     | gccgagagaagcccactatt    | gcgtgtctgtcaccact          | 32 |
| PTPRA    | tacagaggccacacatggtc    | tgcaccacctgtagcagaa        | 47 |
| PTPRCAP  | acttctcgctcgacacagc     | atcccagcccctaagggtg        | 10 |
| PTPRR    | caaactatgctggagagca     | gatcattgttctgaaaagcac      | 38 |
| PTPRU    | acaccatggctacagcac      | ctgtggcctcagtgacc          | 54 |
| PTPRZ1   | tctagtgttcttgggtattctc  | aagtgtgcagctggaagca        | 65 |
| PYCARD   | gggaccaagggtgtagtaagg   | actctggtctcccactcc         | 67 |

|          |                            |                          |    |
|----------|----------------------------|--------------------------|----|
| RAMP1    | tcaccagttccaggtagaca       | cagctccctgtagctcctga     | 43 |
| RARRES3  | ctcctcttggttcgagatg        | aaggcggaaaatctcaatca     | 80 |
| REEP3    | gtagccgatcaaacagttgct      | ttgctcctttggtataggaga    | 46 |
| REEP6    | cctggtcaccgaagtgt          | gatacaggcttagcagagtgcg   | 71 |
| RGS9BP   | gtgtttgaacctcctttgcag      | cattccaggggataaataggatt  | 23 |
| RHBDD2   | tccgtgtcaagtacgtctca       | aggcaccgggtcagttt        | 26 |
| RHBDD3   | tctcgtcctgtctttcca         | acgggtcaaggggtgtcct      | 48 |
| RHBDF1   | accaggatcccagggtgt         | cgctgttttggtgcagat       | 9  |
| RHOT2    | cgggaggagatccacaag         | cagtgggatccacttagttcg    | 49 |
| RNASEK   | ttatggcgtcgtcctgt          | gacattgaaaaatattccgagca  | 73 |
| RNF121   | catcgcaaccttggtgt          | catctgaaagagggtcaccata   | 38 |
| RNF130   | tgtacctgtcctatgtgcaaact    | acgttatcagtacatggcaaattc | 81 |
| RNF150   | gtgggtccaacaccaac          | tggccacgatgtcttctaca     | 9  |
| RNF167   | gctctgtttgggctacctt        | caggcattgtctgggtgag      | 79 |
| RNF19A   | cgttctcatccattagttagtcaa   | acatcgtggacatggcttta     | 50 |
| RNF217   | gccagcgaaattgagcat         | gttcgctggatgtggatctt     | 6  |
| ROR1     | tgggtctcaccttggatg         | ccttggaaatcctttgaatcg    | 33 |
| ROR2     | cccgatccaactctgaaag        | ggccttggacaatgggtgat     | 36 |
| RPN2     | ggcagtgtagcgtttctgg        | tctggaactaatgtgctgttctct | 3  |
| RXFP2    | cccatgagaatctttctcaca      | cgtaagggcatacatattcg     | 68 |
| S100A10  | gagttccctggattttggaa       | cactggtccaggctcctcat     | 76 |
| SAC      | agccctggatgaagtggag        | caaatgtcaggattttatggtga  | 38 |
| SCAMP3   | ttgacgtctacaaccttttga      | gggctggaggctcatagg       | 77 |
| SCARB1   | agctccaagggctctgt          | ggctcacgggtgcctcag       | 4  |
| SCN2A    | ggatttcacagtcattactttgc    | tgctcggagaactctgaatg     | 61 |
| SCN3B    | ggctgatccccctaagagtc       | ttctgagaccacagagggtgaag  | 19 |
| SDC1     | gctactaatttgccccctga       | gtgatatttgcgaaagcacctg   | 21 |
| SDC3     | tgaactggatgaccttactcg      | cgcatggctgtctcaatg       | 15 |
| SDC4     | ggcaggaatctgatgactttg      | ggccgatcatggagtcttc      | 21 |
| SEMA6A   | tctgtggaactaatgcctcaa      | cccgaatggttccaatgtat     | 4  |
| SEMA6B   | gtggctcctggccgtttt         | ggtcaaaggcgcagacag       | 89 |
| SERINC1  | gctctgtgacgttggag          | gcactccacacaaacatgg      | 45 |
| SERINC2  | tctgtgtctcgtgtccatc        | ctgcagcagacccgagtt       | 56 |
| SERP2    | catttcagagcgcacaagc        | ccatggtcccacaggatatt     | 49 |
| SEZ6     | cgctcgcacgggtgagtg         | aagcctggagagacgatgc      | 77 |
| SFT2D3   | gataattctagatccggaatacctgt | aataattcgagctttagaaatcca | 31 |
| SFTPC    | aaagaggtcctgatggagagc      | cagcagggaaatgccaaat      | 24 |
| SFXN4    | agtataattccacagattggacagg  | gatctcatttcataagcacctc   | 3  |
| SIGLEC12 | acttgaccatgactgtcttcca     | cgagccattcctcaaggtt      | 89 |
| SIGLEC15 | gatgctcacagcatggaaaa       | tgttgagcaagttctccgtagt   | 66 |
| SIGLEC6  | gtcccctgcaaattctctctg      | ctcccaggacaccaccag       | 8  |
| SILV     | gcaggttatctgggtcaacaa      | ctggggatacactggctgtc     | 36 |
| SLAMF9   | gcagcagtaaatctatgtgtctacc  | ccttcccagaactctcaaa      | 45 |
| SLC10A2  | tataggatgctgccctggag       | gcagtgtggagcatgtggt      | 16 |
| SLC10A3  | tggctttgtggtgagcatc        | cacgagctggatgtggagt      | 20 |
| SLC10A4  | gacggcgacatgaacctc         | tcaagacgagggccagaa       | 25 |
| SLC12A7  | ttgtaccacttgcgcatcag       | gcagatatgtcgtttcaacca    | 10 |
| SLC12A9  | tgtggatctaaccctctcacc      | acgtgttgggcttcatgc       | 84 |
| SLC13A1  | tcccagctaagacactgactaaaa   | tcagtggagagtaataaaagca   | 2  |
| SLC14A1  | acctggcaaacccacctc         | gactccaagataggccgtga     | 76 |
| SLC14A2  | ccccagcaatgtggaagtt        | ggggctcagacattccttcg     | 76 |
| SLC15A3  | gggcagcagctacacgat         | gaatcagcaccaccacaaca     | 36 |

|          |                            |                           |    |
|----------|----------------------------|---------------------------|----|
| SLC16A1  | cctccataatgttggtgtca       | gactccatattattaccaggatac  | 22 |
| SLC16A4  | ttcatccctacctttcacctg      | ctgactgaccgttcaaggat      | 21 |
| SLC17A4  | ggcaatttaaactgggctca       | cccattgtcggactgaacaa      | 1  |
| SLC17A8  | ggccacaacctctttttgtg       | ccatccaatgtactgcacca      | 20 |
| SLC18A1  | cagccttccaaagtctctcc       | atgttggcaaagcagatgg       | 83 |
| SLC18A2  | gggattctgcatcatgtttgt      | acctggcaatcagcagga        | 67 |
| SLC19A2  | tgggaggacattgagtcaaaa      | aaggagacggcttggttg        | 25 |
| SLC1A3   | ttgaactgaactcggacaaaatta   | attccagctgccccaaatac      | 5  |
| SLC1A4   | tttgcgacagcatttgctac       | gcacttcatcatagaggggaagg   | 78 |
| SLC1A7   | cgcccaggtaacaactac         | gctgcagtggctgtgatac       | 9  |
| SLC20A1  | gaatatttattcttctggttcgtg   | cgcaaaccattaggaactgg      | 88 |
| SLC20A2  | aatcggtagcaaaagggtgc       | ggagatataaaccaagaagcaaaa  | 58 |
| SLC22A10 | ggtggcgtctgtacctttct       | atcaaccaccgagcagattc      | 83 |
| SLC22A16 | ggaggcaatgaataacttaaacctc  | gaagggtgtaggcgggaattt     | 79 |
| SLC22A2  | ctcccgtgatggttttc          | ttcccttagtttctggaagca     | 67 |
| SLC23A3  | atcccactgcctgtgttg         | tggagaatccagcagacaaa      | 64 |
| SLC24A2  | ttggaagcaacatttttgaca      | ggaatctgtgaatgacgggtg     | 36 |
| SLC26A3  | ctggatgacgagagggtgag       | cagaatccaaaagccaact       | 70 |
| SLC26A5  | tgctggtcatattagcaactgg     | tcaggttgacaatcacaatgg     | 64 |
| SLC26A7  | tggaaacctagactcagagaaaacc  | cactgtggtcactgagtttg      | 84 |
| SLC29A1  | caagtccggatgctcactc        | ggttttccctggctgaca        | 40 |
| SLC29A4  | gcaggggctatggctacc         | gtcctttggggactcgttg       | 23 |
| SLC2A1   | ggttgtgccatactcatgacc      | cagataggacatccagggtagc    | 67 |
| SLC2A7   | ctccaccattccatcca          | tactggaaggctgagccaaa      | 19 |
| SLC2A9   | tctgaaggagatgcagagg        | tggttcacttttcaggttttga    | 65 |
| SLC30A3  | atgttgcctctgcacacct        | gggagtagagccgggatg        | 41 |
| SLC30A7  | gatgctgatgctaggtggatt      | tggctgcaaaatcaatctgt      | 19 |
| SLC33A1  | tgcttctgattctaactgcaa      | ctcttctaccaatttcagtctgtt  | 84 |
| SLC35B2  | ggccctgaaactgctcttc        | actcttctctgcagcacacc      | 1  |
| SLC35B3  | tgctgcaaattgattcctgt       | tgcaacattataacgctttcctt   | 63 |
| SLC35E4  | caagtccggtcagcaaatg        | cgagggtggcgtaaagcag       | 63 |
| SLC35F3  | tcgatgtctgccctctacaag      | aaaaataaggcggcttctcc      | 63 |
| SLC36A3  | tgttatggcagacaatttacaaca   | gcagatgtggagggtcacg       | 31 |
| SLC37A4  | gaccagtgactcccccaag        | gccatacaggagaaaccaa       | 24 |
| SLC38A10 | ccatcttcggcatgtcct         | gctcatccaggctgtcgtg       | 44 |
| SLC38A2  | cctatgaaatctgtacaaaagattgg | ttgtgtaccaatccaaaacaa     | 9  |
| SLC38A5  | gagttgcggccacttcag         | tccattcatctttggatcctg     | 15 |
| SLC38A7  | gcaaaactctctgagatggaa      | gaggactccgtagctgacca      | 20 |
| SLC38A9  | cccaaacataggaggatca        | gaatacaaaaggccagtcaca     | 68 |
| SLC39A14 | tctctgccaactggattttg       | cctcattcatctcagggaaaca    | 65 |
| SLC39A3  | ccttgagctccccatc           | gtcacactgtggcctgaca       | 26 |
| SLC39A6  | actggccgttgggacttt         | ggtggtgactgcatgagaa       | 9  |
| SLC39A8  | caatttccaacttattccagagg    | ggtaaaatccaccaaacacagc    | 8  |
| SLC3A2   | ccagaatgccgagatgata        | cacttgaggccaagagtga       | 64 |
| SLC41A2  | gaaatgacattggcatccaga      | tcaatgggtgaatccatctc      | 86 |
| SLC43A3  | aaggagttccttcagcgaag       | tccagaaggagcggagttc       | 29 |
| SLC44A4  | ctaccagagcgtgcaggag        | ccgcaggaagatgagcac        | 18 |
| SLC45A3  | gatcctgccctacacactgg       | gtgtcccctcggattttg        | 7  |
| SLC5A12  | acaggagtgtggtgtatgct       | cccagagatcaaaccagtc       | 37 |
| SLC5A5   | cctcaccagcacctacgagt       | actgcaaagtcccgcaga        | 41 |
| SLC6A15  | tgctaataagctagttgtgaatatgg | ggatagctcagaaattctcagatg  | 79 |
| SLC6A16  | agaagccttggggctagg         | ctgttctcatctcacacagactctc | 24 |

|          |                             |                           |    |
|----------|-----------------------------|---------------------------|----|
| SLC7A14  | catttatgcatggctggt          | ccactggtgtctctgtgtagga    | 72 |
| SLC7A7   | acactgccgtgagaacctg         | aggagaggaaacctcacc        | 72 |
| SLC8A1   | aaaccatcgaagggactgc         | caattacctgactgatattgtttga | 39 |
| SLC8A2   | ggcgtgcactacgaggac          | tcgcatcaactatctcacctg     | 78 |
| SLC9A10  | ccacttctcactgacacacc        | gtgtttttcacagtccatctga    | 63 |
| SLC9A11  | caatgggaataaattcatacgtga    | gggagggaaagaacacacaa      | 72 |
| SLCO1B3  | cggcctaaccttgacctatg        | tgagtgcataaagaaagtggtaca  | 59 |
| SLCO2A1  | caatgcccataggagcaaaa        | cctccaactccttgctca        | 51 |
| SLCO2B1  | gcgaaaggcttagcagtcac        | ccagggtctgcttagagg        | 72 |
| SLCO6A1  | caccactgtggcaactaca         | gaaacaatgacacctcccaga     | 79 |
| SLITRK1  | gactgtggagagctgggaga        | cttctgtcaaaaggggtct       | 71 |
| SLITRK2  | gattcagtcttctcctgatgctg     | ccctgggtatctcgaagag       | 3  |
| SLITRK3  | cctatattgactccttatacacgacct | cgttcgtggtgattacaaaac     | 63 |
| SMO      | gcttccgggactatgtgcta        | agtcagggatgggctgct        | 44 |
| SMPD2    | attggcccagttcatccac         | catgttgaggctccacacaa      | 8  |
| SPACA1   | ggtagaagaatgccgtggac        | gccaatctaactttcaagacttt   | 5  |
| SPEM1    | ggcctcatcatctgcattaa        | ttgggagcttcttctcacia      | 50 |
| SPINT2   | gattcctctgtcccgaagtgc       | catatcgctggagtgttctc      | 8  |
| SPNS3    | catgctggtttgcttcagac        | caaacacagggtgcagacag      | 27 |
| SQLE     | catgagtctccgaaagcag         | acaacacctcaataaactttgcat  | 53 |
| SRD5A2L2 | ttgaaacaggcaaatcaca         | tgggatgagacaacattacattg   | 33 |
| SSPN     | tgctagtacaggacactcca        | agccaagataggccactaagc     | 23 |
| SSTR3    | gagaggggacagcagaatga        | tggtcagcagtcagctattg      | 64 |
| SSTR4    | tgcgccaacctattctcta         | agagaacctcgctggaagg       | 55 |
| STAB1    | cttctccaacctgctatg          | ccctgtagtctggaagca        | 37 |
| STEAP2   | agagagatattgtttctcaacatgg   | ttcttctcattccaagagttttc   | 62 |
| STEAP4   | gattgggaaactaaccgttacc      | agccacatatgaatcactgagc    | 30 |
| STIM1    | tctgatgacctcaggaaa          | gaccttctccacctccactg      | 63 |
| STRA6    | gctctggcctgactgtgtg         | ctgtcccagccaagaaat        | 23 |
| STT3A    | tcgctttggacaggtttaca        | catttcggacacgggtcaaa      | 65 |
| STX8     | agaggcttgggtttgatga         | aaggcctgcatcctgttct       | 84 |
| SV2A     | agatcggcaggctcagaat         | agaagcaggagacacaggaca     | 36 |
| SYNGR1   | tcgccttctccttttctcc         | atctggtaccgctggaagg       | 64 |
| SYNGR2   | ggtgacctgctcttctcagc        | gtccttcgggttggtgact       | 38 |
| SYT10    | cgaaaaccaataacgcactg        | ggatccttgactatcaaaactgg   | 67 |
| SYT2     | atctctcccgcctcctc           | tcctggttctctgaaaatgt      | 6  |
| TACSTD2  | cgcaaaggagacgtttatcc        | ctggtgtgtgcgcaaaag        | 8  |
| TAPT1    | actttgccttgctatggctta       | ccctcaaaatgtcacacacc      | 41 |
| TARP     | gacaattgtcaaaagatgcaaa      | gatgatggcaaaatagaccaca    | 15 |
| TAS2R38  | taatggcagctgtccctct         | gctctcctcaactggcatt       | 46 |
| TAS2R40  | tttcaggctcttgctacaga        | caattcggaatagcagactgaa    | 67 |
| TAS2R7   | ttgcctactattgtcctttctca     | gctaattccgtctctggcata     | 10 |
| TBXA2R   | ctcagctcctgggatcat          | ctgtctggcgatgaagac        | 49 |
| TEDDM1   | cctcatctctcctctgttg         | ggcattacctttaccaagga      | 30 |
| TESSP5   | gacgcagtggtgggtgact         | gggtcagcatggagtgg         | 36 |
| TFRC     | tgagaaaacaatgcaaaatgtga     | cccagttgctgtcctgatataga   | 61 |
| TGFBR2   | caccgcacgttcagaagtc         | tgatgggcagtcctattaca      | 43 |
| TLR3     | agttgtcatcgaatcaaatgaagag   | aatcttcaattgctgaaaa       | 80 |
| TM4SF1   | tttctggcatcgtaggaggt        | ccagcccaatgaagacaaat      | 51 |
| TM4SF19  | tctgattctgacaccagatgc       | aggatacgggagcaagtcc       | 55 |
| TM4SF5   | cctcctgctgtacctaattg        | aatccccggacacagtacc       | 79 |
| TM7SF4   | tgcatgcaaaagctgcttaaa       | aggactggaagccagaaatg      | 7  |

|          |                           |                            |    |
|----------|---------------------------|----------------------------|----|
| TM9SF1   | tggtacaagtctactgtcatccaca | agctccacagagatggcact       | 4  |
| TMBIM6   | tgctggattgcattccta        | ctgggggtgacagcaataca       | 37 |
| TMC4     | tcatctgcctcctgctcat       | actccgccagcagtgct          | 26 |
| TMC7     | acttgctttctggcactgg       | tggtgtaatgtccgtaaaagagg    | 65 |
| TMCO1    | ggctctggttacaggacaga      | ttattgttccttctctttccaa     | 8  |
| TMED10   | ttaatgatttgctacatgaagaa   | gctgaagtataggacccgagtg     | 35 |
| TMED3    | gggttctctgtacctgaggaaa    | caccgaggggtgagcagat        | 81 |
| TMEM101  | tacatcgggggctacgtc        | actgtgcgcgagtacatacg       | 41 |
| TMEM104  | acgcctaccgcatctactg       | tggacgtcaaagaaggtgaa       | 63 |
| TMEM106B | tggtccactgatatgaaacaaa    | tgatggatatcagagtacagaaatca | 6  |
| TMEM109  | agtcgcacgtgaaggatagc      | tcccatggtgaactgatg         | 75 |
| TMEM116  | ggccaagattaagataatcagcag  | cttgaggtcaggcattcagg       | 64 |
| TMEM132A | cctgcttcggcacaactt        | agcccccttccacttgat         | 75 |
| TMEM134  | cagaagaaccgccgagtg        | cgctggagacacctggag         | 3  |
| TMEM138  | cagaactgctccaaaagactcc    | tgaagaggactgcaatatcctg     | 42 |
| TMEM139  | cgctgtgtgcacttttc         | cagtaagtgcattggcaccat      | 1  |
| TMEM147  | cgagtacaacgccttctgg       | agtggccaagaacagcatct       | 19 |
| TMEM158  | gcccttcccctctattgc        | tcattttctgcatgaatctagg     | 12 |
| TMEM160  | gtgtccgagctggatcgt        | aaccaggagagggaaggctgt      | 36 |
| TMEM164  | tgctcaaccccctgcacc        | gatagctccccgacatgga        | 2  |
| TMEM168  | cccatggtacaggagagtg       | tctataagtgtgtcaaggcgtagtg  | 39 |
| TMEM174  | tcacggacggtggaaatc        | gaggagagaagcaggcaca        | 11 |
| TMEM18   | cgcttctctgtcagctctt       | ggctcagtccagtccgtct        | 89 |
| TMEM182  | ggggaggctcatatattgctg     | gcctggaccagatgacata        | 9  |
| TMEM184B | gtggtgaagccactcatgg       | gaggtagccactggtgacg        | 65 |
| TMEM190  | tgacatgttgggctgtgg        | tcccatatgtcacctcaca        | 18 |
| TMEM195  | tcagctggtgttctgtctcg      | tcccaaggcaaattgaaca        | 14 |
| TMEM198  | gtgacagctgagggggact       | gccttttctccttgcgatct       | 74 |
| TMEM205  | ggctcagctcacattctgg       | agcgtaaggctcaggaacag       | 20 |
| TMEM206  | gccgaagctctggtcagt        | gaccaactcctcactcagctc      | 51 |
| TMEM209  | ggtgtccagagctacagatagg    | ttgtgttcaaagtcggaatga      | 37 |
| TMEM211  | ccaaggagaagcagtggtcc      | gaccacaaatcatggcagta       | 59 |
| TMEM219  | agcattgggtaacaatggg       | cccacattccagctcttcac       | 21 |
| TMEM27   | ttgtggttacagaccctcaaa     | gcattgtgatccgggtctt        | 4  |
| TMEM31   | caagaagaagaaatccaacagtca  | tgtgtctgctcttgtgtcg        | 67 |
| TMEM35   | ccgtaactatttggccctct      | catagctcttgaagcacgttca     | 81 |
| TMEM39A  | acctctttgcagactttggt      | gactggaaggccaatagcac       | 75 |
| TMEM45A  | aagaacagaaacagcaacaacaaa  | tctgaaattccccatgatcc       | 28 |
| TMEM50A  | cagaatatgctcagggaatgc     | agtccttgtgggaatcatgc       | 3  |
| TMEM53   | cagcctgtggtgattctctg      | gggctgtgatcggattacg        | 83 |
| TMEM55A  | cactccggaaatgtcactcc      | tggcaatggctgtatatgga       | 45 |
| TMEM60   | tcattcctttatgggcctg       | aaaaagacattatatccgagttctgt | 45 |
| TMEM61   | tccttaccaccacaccttc       | ggctcccgtcacacatct         | 24 |
| TMEM63B  | cagatgcagacaggctcg        | ccccgtgcatagctgaag         | 51 |
| TMEM64   | ttcagaatgcagtgtttcgat     | gcaggggtgtaccaagtaa        | 38 |
| TMEM67   | ttcagtttaaaaggagaaaaccag  | ctccttctaaagttgccactg      | 38 |
| TMEM77   | ccatatagaccggctttacc      | cattgccccaaataagcatt       | 50 |
| TMEM82   | ccatctgtacacgctgct        | gtctgcacctggctctgc         | 63 |
| TMEM85   | tcattgagccccctgaga        | cgctgcttctcatgttcac        | 22 |
| TMEM86B  | ggacgctgtcctcatctg        | aggggagagaagccgaag         | 10 |
| TMEM88   | gtcaccatgctgggcttc        | ccagtagggccgtgaaac         | 53 |
| TMEM89   | tgatctgccgaagatactg       | aggggtgtggtctgagattgg      | 49 |



|           |                           |                          |    |
|-----------|---------------------------|--------------------------|----|
| TMEM92    | agccaaatgtggctcatcc       | ccaggaagatgatgacgaaga    | 2  |
| TMEM93    | gacctcccggcagcttc         | gcgccggacacactacta       | 86 |
| TMEM95    | tctctgcttctgggtgctc       | gcgcttcacaagccacttt      | 10 |
| TMPRSS11F | ggagccagcctcatcagtaa      | caatccattgagttgggtcttt   | 46 |
| TMPRSS4   | cgaggagcactgtgtcaaga      | agtgtggatcggtccttg       | 59 |
| TMPRSS5   | gctctgctccctgcactc        | gtggctgatccctcacttg      | 11 |
| TMPRSS6   | gccagtggacgatccaga        | gatcctctcggcgtaggg       | 75 |
| TMPRSS9   | catcatcaacgccaggtg        | ttcgtcgggtcttggaaact     | 84 |
| TMTC3     | ccgactcaagcaggcttac       | gctcctttgctttaagaggttt   | 82 |
| TNF       | cagcctcttctcctctgat       | gccagagggtgattagaga      | 29 |
| TNFRSF10B | tcagccttatcagtgtttaagattg | gagccaagatcgtagcgttg     | 19 |
| TNFRSF12A | gaccgcacagcgactct         | cacgaaggcaggctcaga       | 26 |
| TNFRSF18  | aggccaggggtacagtc         | aaggtttgagtgccctc        | 47 |
| TNFRSF19  | ggagtgtgtgcctgtgga        | gcgatctcagcagggtga       | 63 |
| TNFRSF1A  | gagaggccatagctgtctg       | gaggggtatattcccaccaac    | 59 |
| TNFRSF8   | tgtgtcccctacccaatctg      | tggtgtccttctcagccata     | 45 |
| TNMD      | gccggaggtacccaaaa         | ctggtcacaggatcaattcc     | 86 |
| TOR1AIP2  | gatacactgaggaggcgactg     | ccaattttgtgtttgtgtgg     | 11 |
| TP53I13   | ccaagagtgcactacacacgag    | caggggtgtagaggaaggt      | 30 |
| TPBG      | cgctactctggtggaactca      | cctctcgcctctgttgg        | 70 |
| TPE       | tggatttgacctagacctcactt   | accgcacaactccttgatt      | 8  |
| TREM2     | tctgagagcttcgaggatgc      | ggtgggaaggggatttctc      | 80 |
| TREML1    | cccagattttgcacagagt       | actccaatcttatgggtctct    | 6  |
| TRPC3     | ttctggccattggctact        | aaaagggcttcgagaattt      | 40 |
| TRPM1     | taactgccctgctgaaagga      | agccagtccaagctcag        | 50 |
| TRPM3     | cggacctctaccacaacc        | ctcgctcaaggaatatca       | 3  |
| TRPM5     | agctggacacggtcatcct       | tgagctcatccagatagctctg   | 76 |
| TRPM6     | aaagtcaattggagttgacaaga   | tggtctgagaaagcctcatta    | 75 |
| TRPM8     | ggtcctgtactcgctggtct      | cacccatttacgtaccactg     | 35 |
| TRPV1     | cagcagcgagaccctaa         | cctgcaggagtcggttca       | 22 |
| TRPV2     | cccctgctactgagaagctc      | gtcgggtgtggcctgact       | 3  |
| TRPV4     | caacaacgacggcctctc        | ggatgatgtgctgaaagatcc    | 46 |
| TSPAN1    | ccctcgtgacgttctcttc       | gcaacgtcaggaagtgtc       | 63 |
| TSPAN10   | tctgtccagcgtcaaggat       | ttctggcctgcagtttct       | 55 |
| TSPAN13   | ccctcaacctgctttacacc      | aatcagcccgaagccaat       | 84 |
| TSPAN17   | gacgtccggctcaaactg        | agcctttggtgtgaggaag      | 24 |
| TSPAN6    | ttggagttgctgtctcca        | ttgggttacactatctcactggtt | 34 |
| TSPAN9    | gttctctcaattgatattctg     | gagagccagatgcccactc      | 5  |
| TUSC5     | catcatgggcatcgctatta      | cccagctccctgcttaagtt     | 49 |
| TYROBP    | gagaccgagtcgccttatca      | ctgtgtgtgaggtcgtgt       | 1  |
| UBIAD1    | cacttggtcttatctactttgga   | gtctccagagccacgtact      | 36 |
| UNC50     | gacctgcttctgtgtcct        | gtccagcacaagccaaatc      | 21 |
| UNC5A     | agcacagacgggagcagt        | cctgctgcctgagacatta      | 44 |
| UNC93A    | accaacagcaccagagg         | atcatcaggacagccaggac     | 3  |
| UNC93B1   | gcaactggtatcgcttgg        | taagccacgaggaggaagc      | 19 |
| UPK1A     | ggtagccagttttgtgtgg       | agcatgagcaccaggtacg      | 70 |
| UPK2      | gcataccaggtgacaaacctc     | tggattccatgttctctg       | 72 |
| UTS2R     | gtacgtctacgtgtgcaacctg    | cacgatgaaggggatgct       | 62 |
| VAMP1     | gtgctccaagctaaagagg       | agatggctcccagcatga       | 31 |
| VAMP3     | cgaagactcagcagacacaa      | tgtccacgttaactcgatt      | 77 |
| VAMP5     | agcgttcagaccaactcctg      | ccacgcagatccggtaac       | 14 |
| VANGL1    | ccctgttgggaaatgattctac    | tctctcccagttgtcatcc      | 6  |

|        |                          |                          |    |
|--------|--------------------------|--------------------------|----|
| VAPB   | tttgctccaactgacactca     | ccataaggtctccggtttg      | 38 |
| VASN   | cgccaggaaagactgagg       | accctggagcacatcttctg     | 70 |
| VLDLR  | ggagaagatgaagaaaactgtgg  | catcctggccattgcatac      | 80 |
| VSIG4  | cactgacatggatggctacct    | aagacaggcaggctctttcc     | 54 |
| VSIG8  | acaccgagcctagagacatga    | gttgatccgcacagcagac      | 25 |
| WBP1   | ggttactgcttgacctcg       | gcctggggccacagtataa      | 73 |
| WBSR28 | acgaggtctcagtgtgtt       | acaccagtggtgaagagg       | 68 |
| WFS1   | ccaagtccctgcagaag        | atccagcgcgatgtagtct      | 89 |
| XCR1   | ctgggctcaagcaatcttc      | gcaggacggttagagcatc      | 33 |
| XKR6   | tctggagtgggggaagt        | tgagtctgccacccaac        | 27 |
| XKRY   | gcatctggagaaaattcagtaaaa | cctacccttctccatgagtata   | 73 |
| XKRY2  | gcatctggagaaaattcagtaaaa | cctacccttctccatgagtata   | 73 |
| YIF1B  | gcaatggcttcatcacctac     | aggaggtctggggagaacc      | 83 |
| ZDHC1  | ggcttgggatcctgttc        | caaggtggcagcaaaga        | 51 |
| ZDHC12 | gaatcacgctggtgctctc      | caggagcaggaaggtgagg      | 24 |
| ZDHC16 | gcctcaggcaaaatcag        | taaccagcagcagaaggag      | 13 |
| ZDHC19 | cctgcaatggtgtccaag       | gcagtggtggtcaaagtct      | 38 |
| ZDHC20 | cgctgtggacagtgaatc       | tgcaaatgaaaattgaaaatacca | 19 |
| ZDHC4  | tgaaaattaccaaccaagagaa   | gcaccgaagccaggtaga       | 35 |
| ZP1    | gccacagggtccatcac        | gttgaagacacagcgacat      | 11 |
| ZP2    | agtgaacgtgtcgtggat       | ggatggaaggtggtctgta      | 85 |
| *RPL27 | atgaaacctgggaaggtgt      | gtagggcgatctgaggtg       | 20 |
| *BCR   | ctatgagcgtgcagagtga      | agctccacggatgtcagg       | 32 |

---

\*Primers used for reference genes.
