# Supplementary material
Source: PubMed Central journal article supplement (PMC2757864)
Supplement: 0907939106_ST3_PDF.pdf [file 0907939106_ST3_PDF.pdf]

**Table S3A. Features of GBM samples**

| <b>ID</b> | <b>Patient age (years)</b> | <b>Sex</b> | <b>Tumor</b> | <b>Tumor site</b>                | <b>Survival</b> | <b>Sample type</b>                  |
|-----------|----------------------------|------------|--------------|----------------------------------|-----------------|-------------------------------------|
| 1GN       | 44                         | F          | N            | -                                | -               | Microdissected normal tissue (pool) |
|           | 32                         | M          | N            | -                                | -               |                                     |
|           | 23                         | F          | N            | -                                | -               |                                     |
| 2GN       | 39                         | M          | N            | -                                | -               | Microdissected normal tissue (pool) |
|           | 19                         | M          | N            | -                                | -               |                                     |
|           | 69                         | M          | N            | -                                | -               |                                     |
| 3GN       | 17                         | F          | N            | -                                | -               | Microdissected normal tissue (pool) |
|           | 18                         | F          | N            | -                                | -               |                                     |
|           | 43                         | M          | N            | -                                | -               |                                     |
| 4GN       | 37                         | F          | N            | -                                | -               | Microdissected normal tissue (pool) |
|           | 16                         | M          | N            | -                                | -               |                                     |
|           | 31                         | M          | N            | -                                | -               |                                     |
| 5GN       | 45                         | F          | N            | -                                | -               | Microdissected normal tissue (pool) |
|           | 34                         | F          | N            | -                                | -               |                                     |
|           | 46                         | M          | N            | -                                | -               |                                     |
| 1GT       | 45                         | M          | Y            | Right parietal lobe              | 0m              | Microdissected tumor tissue         |
| 2GT       | 61                         | F          | Y            | Right fronto-parietal lobe       | 0m              | Microdissected tumor tissue         |
| 3GT       | 86                         | F          | Y            | Temporal                         | 2m              | Microdissected tumor tissue         |
| 4GT       | 59                         | F          | Y            | Right parietal lobe              | 0m              | Microdissected tumor tissue         |
| 5GT       | 64                         | M          | Y            | Right and left parietal lobe     | 4m              | Microdissected tumor tissue         |
| 6GT       | 47                         | F          | Y            | Right and left frontal lobe      | 0m              | Microdissected tumor tissue         |
| 7GT       | 56                         | M          | Y            | Right temporal lobe              | 11m             | Microdissected tumor tissue         |
| 8GT       | 68                         | M          | Y            | Right occipital lobe             | 5m              | Microdissected tumor tissue         |
| 9GT       | 52                         | M          | Y            | Left temporal lobe               | 1y 2m           | Microdissected tumor tissue         |
| 10GT      | 68                         | F          | Y            | Parietal lobe and right temporal | 1y 4m           | Microdissected tumor tissue         |
| 11GT      | 58                         | M          | Y            | Right temporal lobe              | 1y 0m           | Microdissected tumor tissue         |
| HOG       | -                          |            | Y            | -                                | -               | cell line                           |
| T98G      | 61                         | M          | Y            | -                                | -               | cell line                           |
| A172      | 53                         | M          | Y            | -                                | -               | cell line                           |
| U87MG     | 44                         | F          | Y            | -                                | -               | cell line                           |

**Table S3B. Features of colorectal samples**

| <b>ID</b>  | <b>Patient age (years)</b> | <b>Sex</b> | <b>Tumor</b> | <b>Tumor site</b> | <b>Dukes's stage</b> | <b>Staging UICC</b> | <b>Sample Type</b>           |
|------------|----------------------------|------------|--------------|-------------------|----------------------|---------------------|------------------------------|
| 1CN        | 54                         | F          | N            | Rectosigmoid      | -                    | -                   |                              |
|            | 49                         | M          | N            | Sigmoid           | -                    | -                   | Microdissected normal tissue |
|            | 71                         | M          | N            | Rectosigmoid      | -                    | -                   | (pool)                       |
|            | 79                         | M          | N            | Rectum            | -                    | -                   |                              |
| 2CN        | 65                         | M          | N            | Colon sigmoid     | -                    | -                   | Microdissected normal tissue |
|            | 66                         | M          | N            | Left colon        | -                    | -                   | (pool)                       |
|            | 67                         | F          | N            | Transverse colon  | -                    | -                   |                              |
| 1CT        | 54                         | F          | Y            | Rectosigmoid      | -                    | I                   | Microdissected tumor tissue  |
| 2CT        | 49                         | M          | Y            | Sigmoid           | -                    | I                   | Microdissected tumor tissue  |
| 3CT        | 71                         | M          | Y            | Rectosigmoid      | -                    | III                 | Microdissected tumor tissue  |
| 4CT        | 45                         | F          | Y            | Rectum            | -                    | III                 | Microdissected tumor tissue  |
| 5CT        | 79                         | M          | Y            | Rectum            | -                    | III                 | Microdissected tumor tissue  |
| 6CT        | 65                         | M          | Y            | Colon sigmoid     | -                    | IV                  | Microdissected tumor tissue  |
| 7CT        | 66                         | M          | Y            | Left colon        | -                    | I                   | Microdissected tumor tissue  |
| 8CT        | 67                         | F          | Y            | Transverse colon  | -                    | II                  | Microdissected tumor tissue  |
| 9CT        | 52                         | F          | Y            | Transverse colon  | -                    | III                 | Microdissected tumor tissue  |
| 10CT       | 88                         | F          | Y            | Rectosigmoid      | -                    | 0                   | Microdissected tumor tissue  |
| 11CT       | 60                         | F          | Y            | Rectum            | -                    | III                 | Microdissected tumor tissue  |
| HCT116     | adult                      | M          | Y            | -                 | -                    | -                   | cell line                    |
| HCT8       | 67                         | M          | Y            | -                 | -                    | -                   | cell line                    |
| LS147      | -                          | -          | Y            | -                 | -                    | -                   | cell line                    |
| SW480      | 50                         | M          | Y            | -                 | B                    | -                   | cell line                    |
| DLD1       | 50                         | M          | Y            | -                 | B                    | -                   | cell line                    |
| WIDR       | 78                         | F          | Y            | -                 | -                    | -                   | cell line                    |
| COLOHSR320 | 55                         | F          | Y            | -                 | C                    | -                   | cell line                    |
| COLODM320  | 55                         | F          | Y            | -                 | C                    | -                   | cell line                    |
| LS180      | 58                         | F          | Y            | -                 | B                    | -                   | cell line                    |
