# Supplementary material
Source: PubMed Central journal article supplement (PMC2757864)
Supplement: 0907939106_ST4_PDF.pdf [file 0907939106_ST4_PDF.pdf]

**Table S4. Surfaceome genes showing a restricted expression in normal samples.**

| Gene     | bone marrow | brain | breast | colon | fetal brain | fetal liver | heart | kidney | liver | lung | placenta | prostate | skeletal muscle | small intestine | spinal cord | spleen | stomach | testis | thymus | trachea | uterus |
|----------|-------------|-------|--------|-------|-------------|-------------|-------|--------|-------|------|----------|----------|-----------------|-----------------|-------------|--------|---------|--------|--------|---------|--------|
| ABCB11   |             |       |        | ■     |             | ■           |       |        | ■     |      |          |          |                 |                 |             |        |         |        |        |         |        |
| ABCB4    |             |       |        | ■     | ■           | ■           |       |        |       |      |          |          |                 |                 |             |        |         |        |        |         |        |
| ADAM30   |             |       | ■      | ■     |             |             |       |        |       |      |          |          |                 |                 |             |        |         | ■      | ■      |         |        |
| ADIPOR2  |             |       | ■      |       |             |             |       |        |       |      |          | ■        |                 |                 |             |        |         | ■      |        |         |        |
| ADORA3   |             | ■     | ■      |       |             |             |       |        |       | ■    |          | ■        |                 |                 | ■           |        |         |        | ■      |         |        |
| AGTR1    |             |       | ■      |       |             |             |       |        |       |      |          | ■        |                 |                 |             |        |         |        |        |         |        |
| AMIGO2   |             |       |        |       |             |             |       |        |       |      |          |          |                 |                 |             |        |         |        |        |         |        |
| ANO7     |             |       |        |       |             |             |       |        |       |      |          |          |                 |                 |             |        |         |        |        |         |        |
| AQP6     |             | ■     |        |       |             |             |       | ■      | ■     |      |          |          |                 |                 | ■           |        |         | ■      |        |         |        |
| ATP13A5  |             | ■     | ■      |       | ■           |             |       |        |       | ■    |          |          |                 |                 |             |        | ■       | ■      |        |         | ■      |
| ATP1A4   |             |       |        |       |             |             |       |        |       |      | ■        |          |                 |                 |             |        |         | ■      |        |         |        |
| ATP6V0E1 |             | ■     | ■      | ■     |             |             |       |        |       | ■    |          |          |                 |                 |             |        |         |        |        |         |        |
| ATP8B3   |             |       | ■      |       |             |             |       |        |       | ■    |          | ■        |                 |                 |             |        |         | ■      |        |         | ■      |
| C13orf36 |             | ■     |        |       | ■           |             |       |        |       | ■    |          | ■        |                 |                 |             |        | ■       | ■      | ■      |         | ■      |
| C4orf34  |             |       | ■      | ■     |             |             |       |        |       |      |          |          |                 |                 |             |        |         |        |        |         |        |
| C6orf64  |             |       | ■      |       | ■           |             |       |        |       |      |          | ■        |                 |                 |             |        |         | ■      |        |         |        |
| CA14     |             |       | ■      |       |             |             | ■     |        |       |      |          | ■        |                 |                 | ■           |        |         |        |        |         |        |
| CACNA1G  |             | ■     | ■      |       | ■           |             |       |        |       |      |          |          |                 |                 | ■           |        |         |        |        |         |        |
| CACNG8   |             | ■     | ■      |       | ■           |             |       |        |       | ■    |          |          |                 |                 | ■           |        |         | ■      |        |         |        |
| CADM2    |             | ■     | ■      | ■     | ■           |             |       |        |       |      |          |          | ■               |                 | ■           |        | ■       |        |        |         |        |



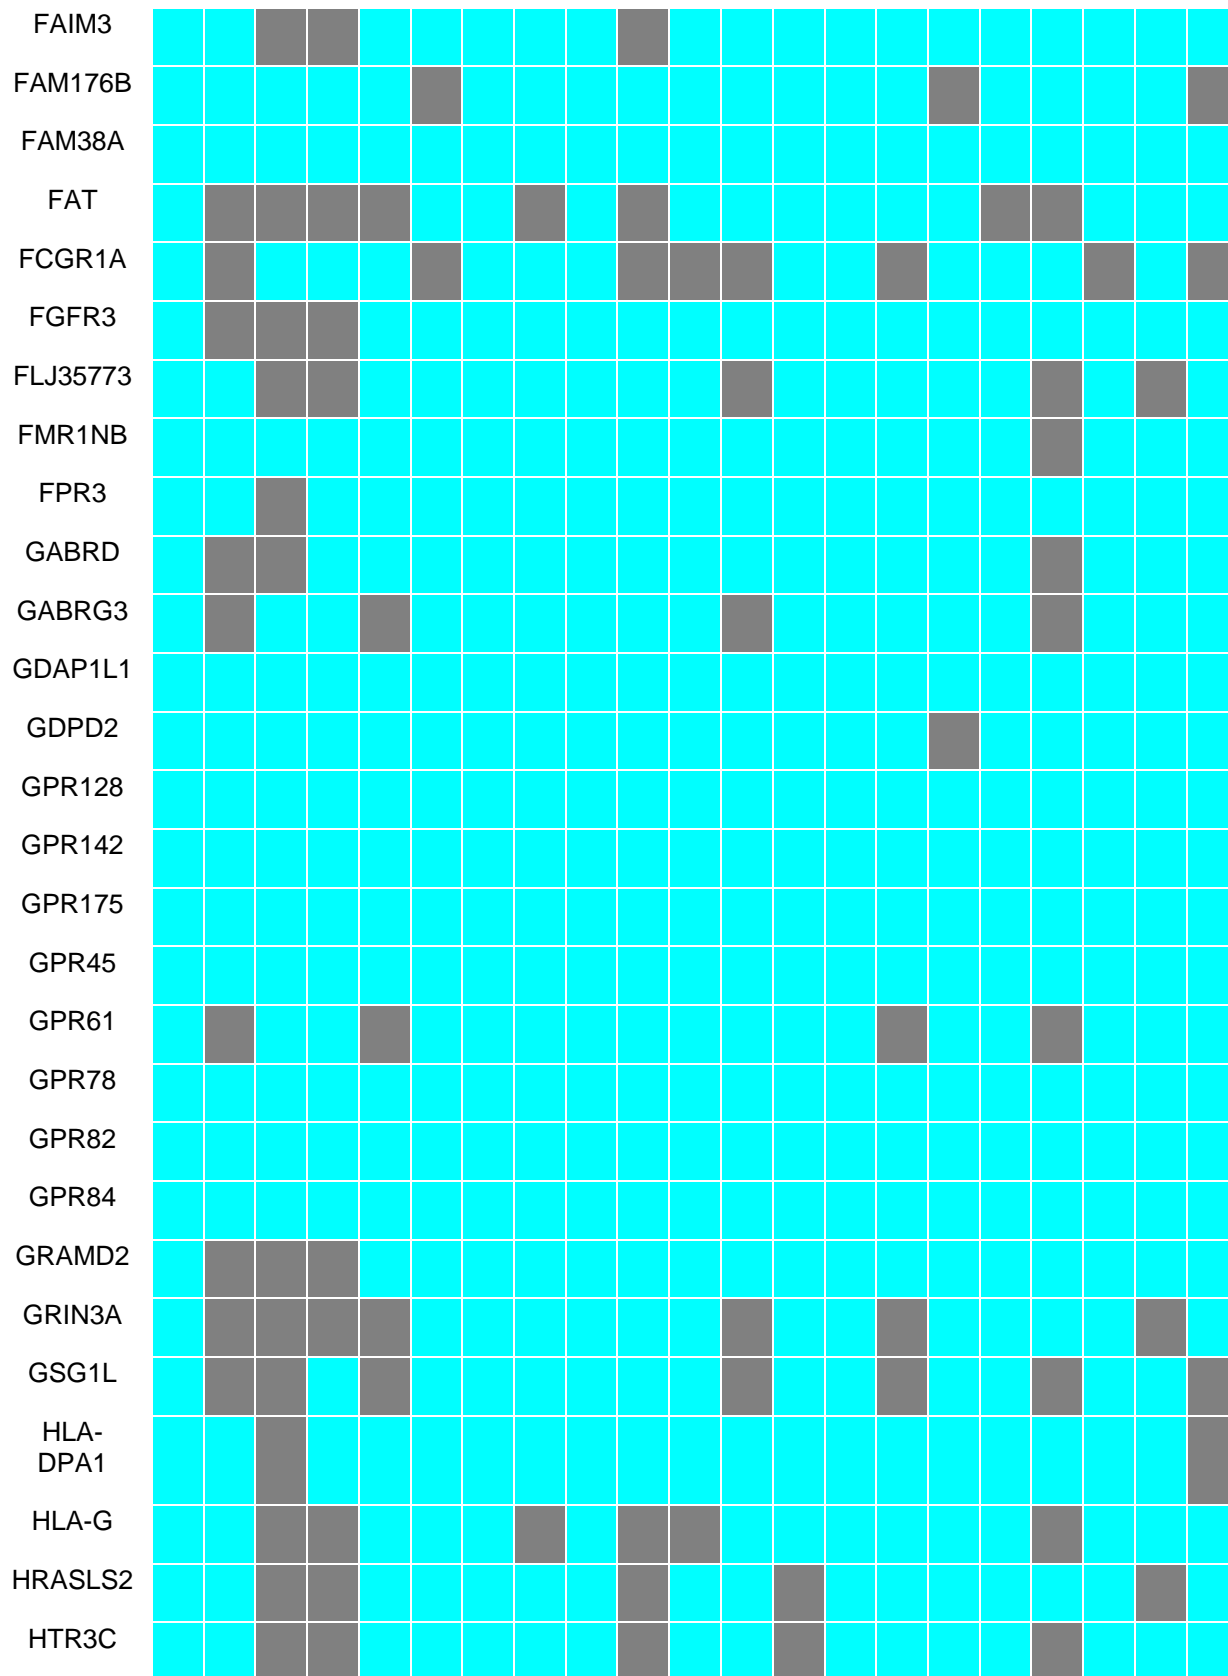



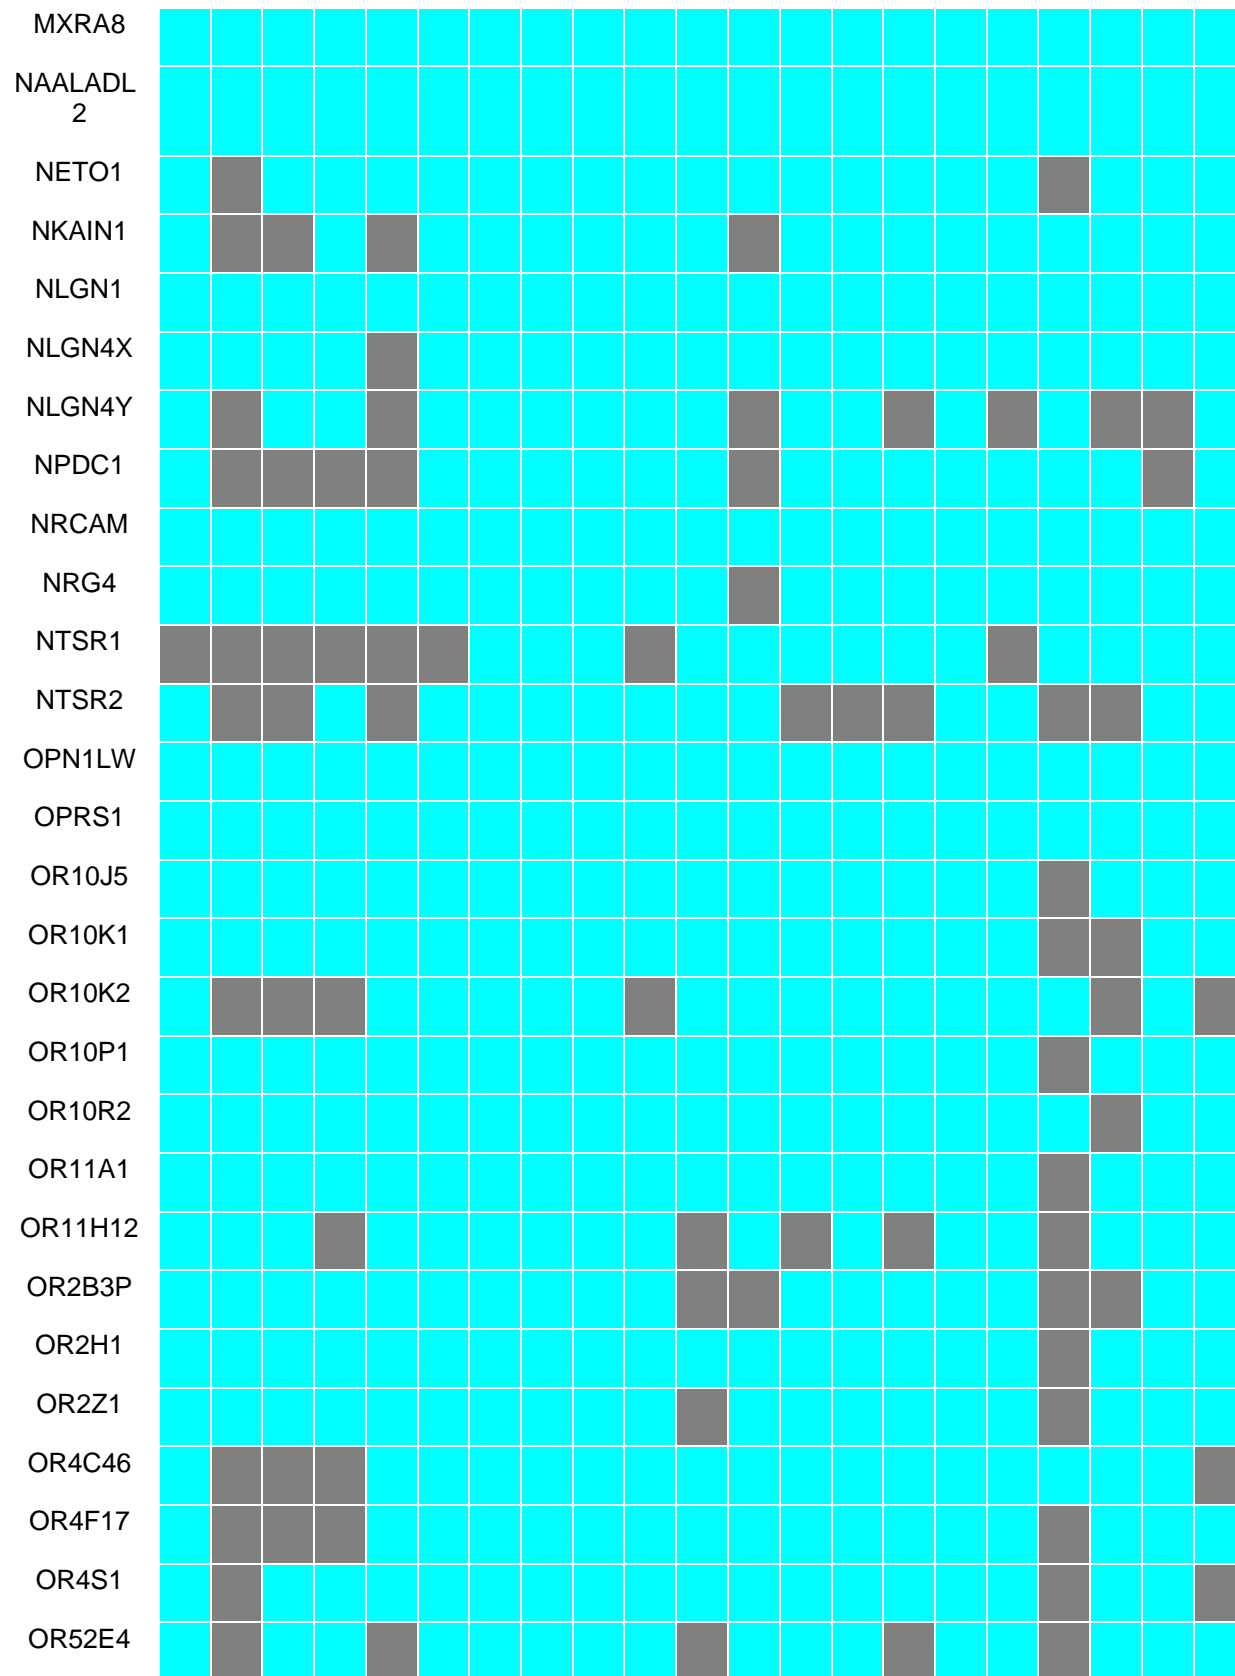



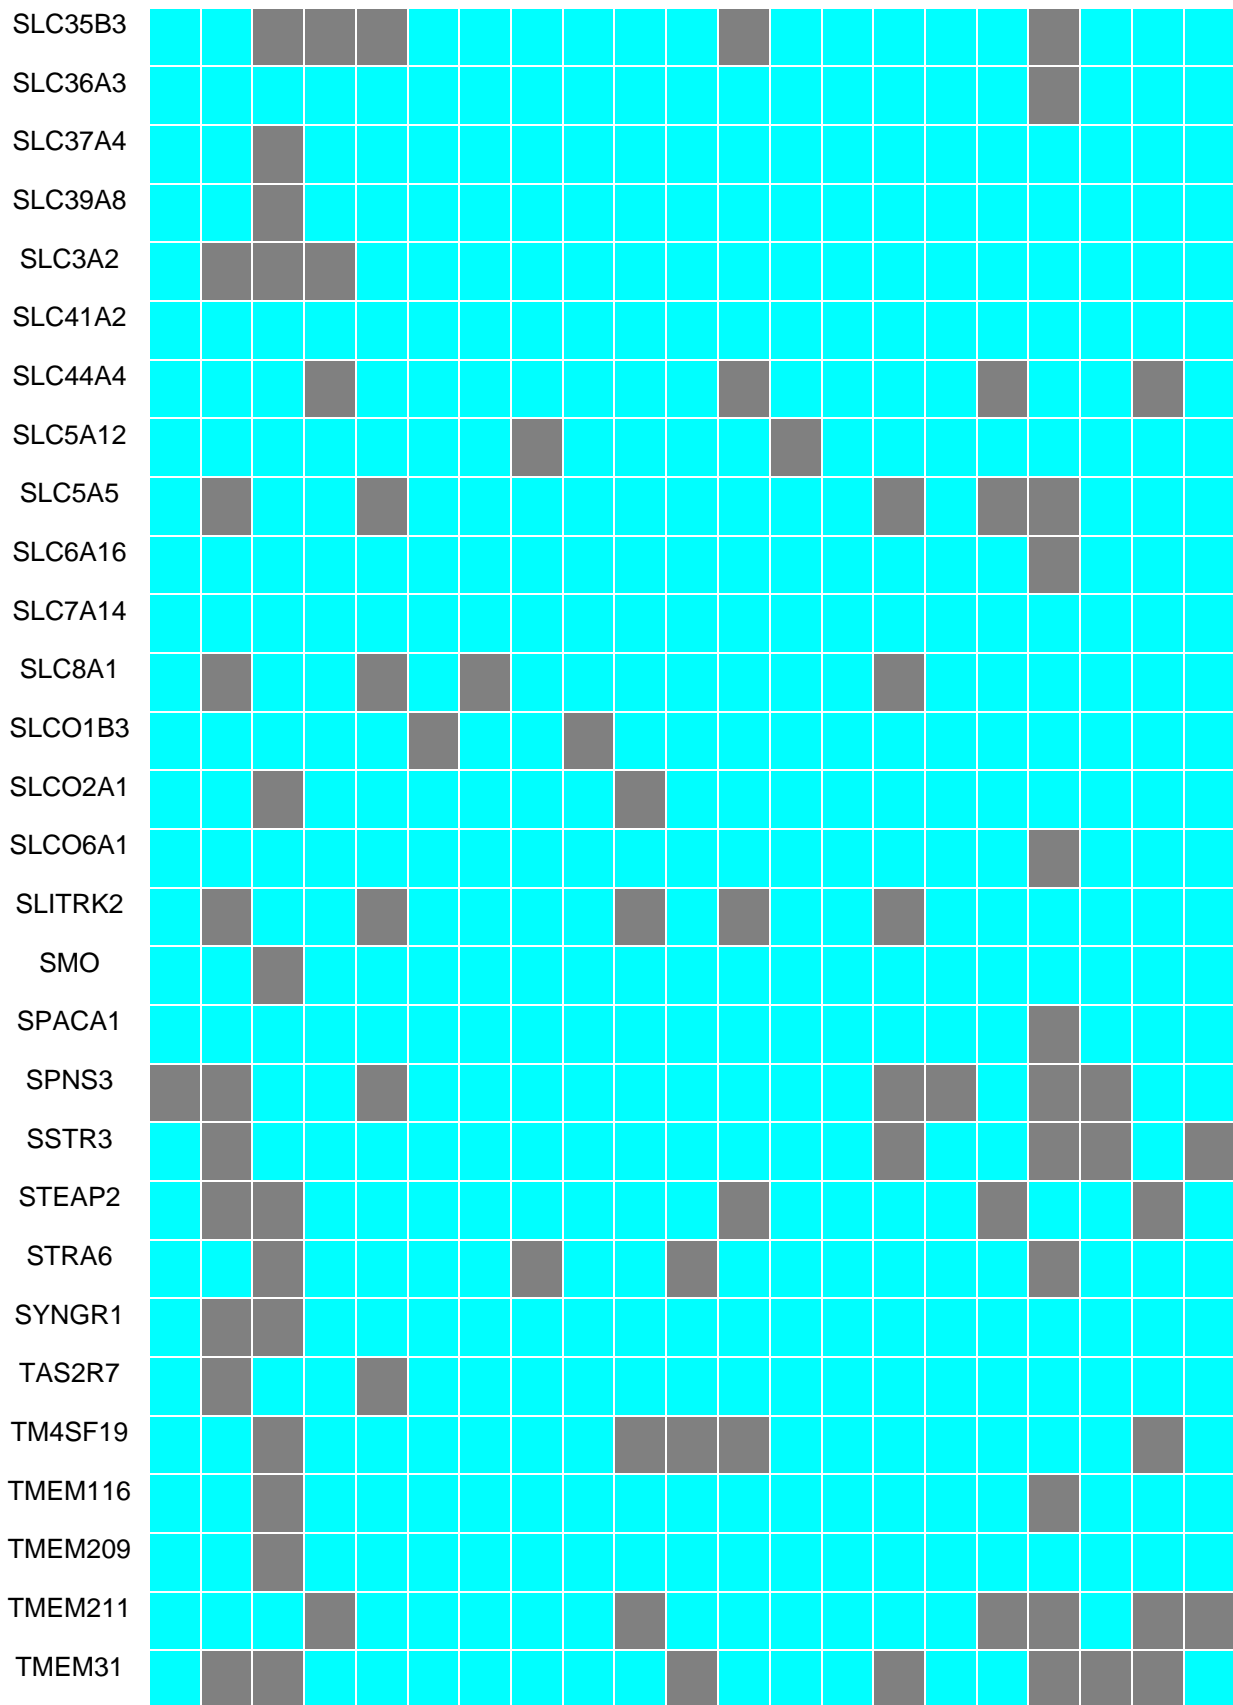

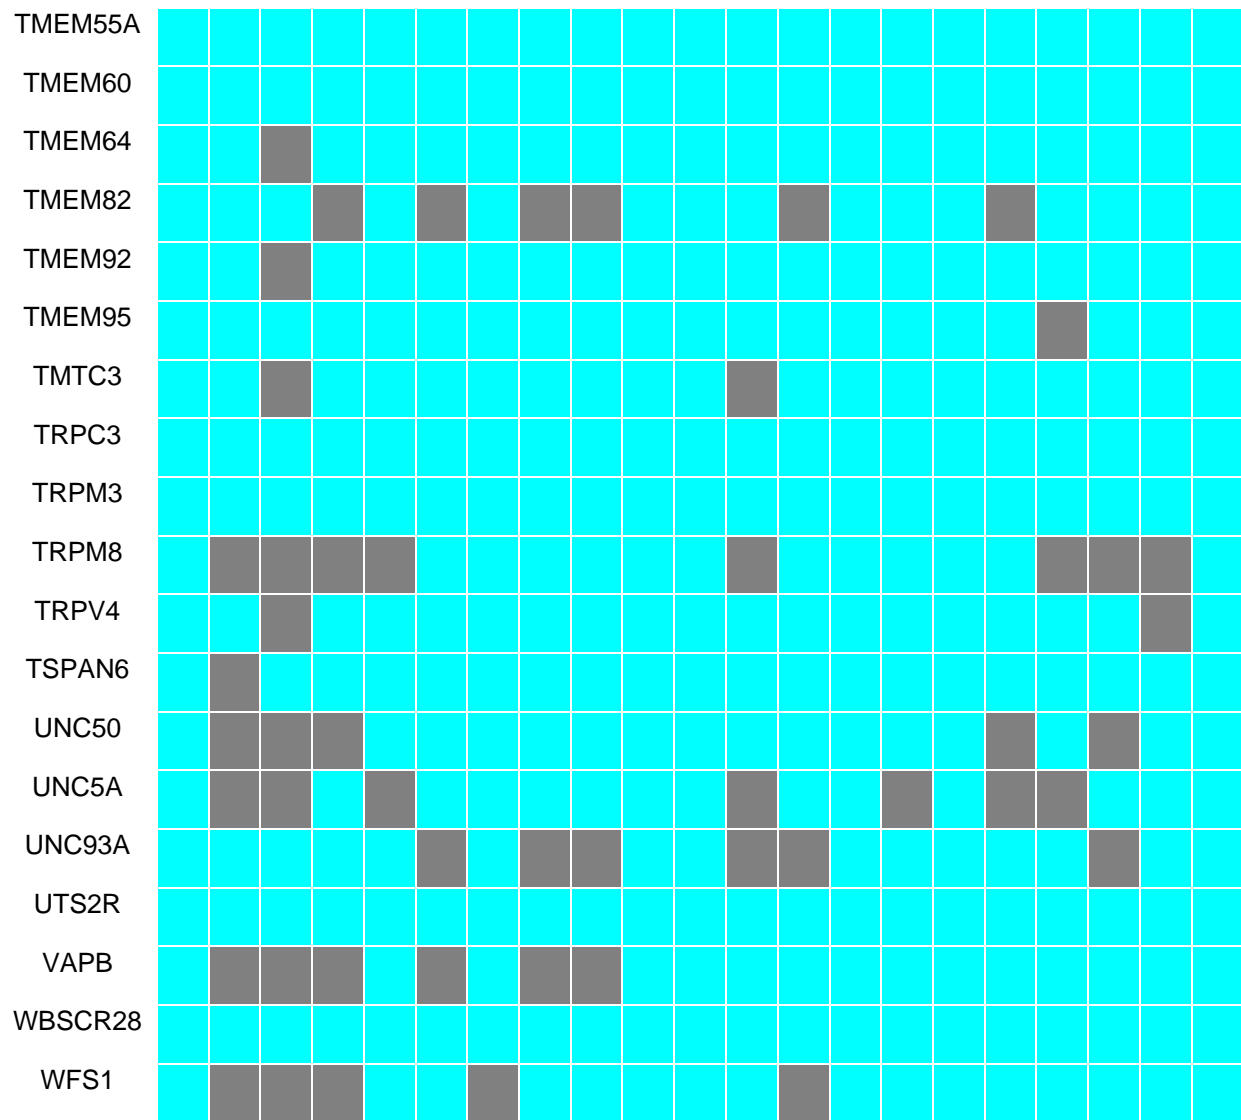

Genes were considered restrictedly expressed if they were expressed in 5 or less normal samples (excluding fetal brain, fetal liver, placenta, testis and brain) in at least two qPCR experiments.

Gray represents samples expressed in at least 2 qPCR experiments.
