# Supplementary material
Source: PubMed Central journal article supplement (PMC2757864)
Supplement: 0907939106_ST5_PDF.pdf [file 0907939106_ST5_PDF.pdf]

Table S5. Expression of putative cell surface CTs in tumors according to ONCOMINE

| Gene      | CHR | TUMORS  |       |        |       |           |         |               |        |          |       |      |       |          |          |        |      |
|-----------|-----|---------|-------|--------|-------|-----------|---------|---------------|--------|----------|-------|------|-------|----------|----------|--------|------|
|           |     | Bladder | Brain | Breast | Colon | Esophagus | Gastric | Head and Neck | Kidney | Leukemia | Liver | Lung | Ovary | Pancreas | Prostate | Testis | Skin |
| ADAM30*   | 1   | -       | -     | √      | -     | -         | -       | -             | -      | -        | -     | -    | -     | -        | -        | -      | -    |
| ATP1A4    | 1   | -       | -     | -      | -     | -         | -       | -             | -      | -        | -     | -    | -     | -        | -        | -      | -    |
| CATSPER4* | 1   | -       | -     | -      | -     | -         | -       | -             | -      | -        | -     | -    | -     | -        | -        | -      | -    |
| EPHA10    | 1   | -       | -     | -      | -     | -         | -       | -             | -      | -        | -     | -    | -     | -        | -        | -      | -    |
| GABRD     | 1   | √       | -     | -      | -     | -         | -       | √             | √      | -        | √     | -    | -     | √        | -        | √      | -    |
| GPR61     | 1   | -       | -     | -      | -     | -         | -       | -             | -      | -        | -     | -    | -     | -        | -        | √      | -    |
| LPGAT1    | 1   | -       | -     | √      | √     | √         | √       | √             | √      | -        | √     | √    | √     | √        | -        | -      | √    |
| OR10J5    | 1   | -       | -     | -      | -     | -         | -       | -             | -      | -        | -     | -    | -     | -        | -        | -      | -    |
| OR10K1    | 1   | -       | -     | -      | -     | -         | -       | -             | -      | -        | -     | -    | -     | -        | -        | -      | -    |
| RGSL1*    | 1   | -       | -     | -      | -     | -         | -       | -             | -      | -        | -     | -    | -     | -        | -        | -      | -    |
| SAC*      | 1   | -       | -     | √      | -     | -         | -       | -             | -      | -        | -     | -    | √     | -        | -        | -      | √    |
| ST7L      | 1   | -       | √     | √      | √     | -         | -       | -             | -      | -        | -     | -    | -     | -        | -        | -      | -    |
| TEDDM1    | 1   | -       | -     | √      | -     | -         | -       | -             | -      | -        | -     | -    | -     | -        | -        | -      | -    |
| VANGL1    | 1   | -       | √     | √      | -     | -         | -       | √             | √      | √        | -     | √    | √     | -        | √        | √      | -    |
| ABHD1     | 2   | -       | -     | √      | -     | -         | -       | -             | -      | √        | -     | -    | -     | -        | -        | -      | -    |
| CCDC108   | 2   | -       | -     | -      | -     | -         | -       | -             | -      | -        | -     | -    | -     | -        | -        | -      | -    |
| FER1L5    | 2   | -       | -     | -      | -     | -         | -       | -             | -      | -        | -     | -    | -     | -        | -        | -      | -    |
| TM4SF20   | 2   | -       | -     | -      | -     | √         | -       | -             | -      | √        | -     | -    | -     | √        | -        | -      | -    |
| GRAMD1C   | 3   | √       | -     | √      | -     | -         | -       | -             | √      | -        | -     | -    | √     | -        | -        | -      | -    |
| IQCF1     | 3   | -       | -     | √      | -     | -         | -       | -             | -      | -        | -     | -    | -     | -        | -        | -      | -    |
| SLC9A10*  | 3   | -       | -     | -      | -     | -         | -       | -             | -      | -        | -     | -    | -     | -        | -        | -      | -    |
| TM4SF19   | 3   | -       | -     | √      | -     | -         | -       | √             | -      | -        | √     | -    | -     | -        | √        | -      | -    |
| BTC       | 4   | √       | -     | √      | -     | -         | -       | √             | -      | -        | √     | -    | √     | -        | √        | -      | -    |
| COL25A1   | 4   | -       | -     | √      | -     | -         | -       | -             | -      | -        | -     | -    | -     | -        | -        | -      | -    |
| MFAP3L    | 4   | √       | -     | -      | -     | √         | -       | √             | -      | -        | -     | √    | -     | √        | -        | -      | -    |
| SORCS2    | 4   | -       | -     | √      | -     | -         | -       | √             | -      | -        | -     | -    | -     | -        | -        | -      | -    |
| CATSPER3  | 5   | -       | -     | -      | -     | -         | -       | -             | -      | -        | -     | -    | -     | -        | -        | -      | -    |
| PCDHB16   | 5   | -       | √     | √      | -     | -         | -       | -             | -      | -        | -     | -    | -     | -        | -        | -      | -    |
| PCDHB3    | 5   | -       | √     | -      | -     | -         | -       | -             | -      | -        | √     | -    | √     | √        | -        | -      | -    |
| PKD2L2    | 5   | √       | √     | √      | -     | -         | -       | √             | -      | -        | -     | -    | -     | -        | -        | -      | -    |
| SLC36A3*  | 5   | -       | -     | -      | -     | -         | -       | -             | -      | -        | -     | -    | -     | -        | -        | -      | -    |
| SLCO6A1*  | 5   | -       | -     | -      | -     | -         | -       | -             | -      | -        | -     | -    | -     | -        | -        | -      | -    |
| TIMD4     | 5   | -       | -     | √      | -     | -         | -       | -             | -      | -        | -     | -    | -     | -        | -        | -      | -    |
| UNC5A     | 5   | -       | -     | -      | -     | -         | -       | -             | -      | -        | -     | -    | -     | -        | -        | √      | -    |
| C6ORF64   | 6   | -       | -     | -      | -     | -         | -       | -             | -      | -        | -     | -    | -     | -        | -        | -      | -    |
| CCR6      | 6   | -       | √     | -      | -     | -         | -       | -             | -      | -        | √     | -    | -     | -        | -        | √      | -    |
| LHFPL5    | 6   | -       | -     | -      | -     | -         | -       | -             | -      | -        | -     | -    | -     | -        | -        | -      | -    |
| OPN5*     | 6   | -       | -     | √      | -     | -         | -       | -             | -      | -        | -     | -    | -     | -        | -        | -      | -    |
| OR11A1*   | 6   | -       | -     | -      | -     | -         | -       | -             | -      | -        | -     | √    | -     | -        | -        | -      | -    |
| OR2B3P    | 6   | -       | -     | -      | -     | -         | -       | -             | -      | -        | -     | -    | -     | -        | -        | -      | -    |
| OR2H1*    | 6   | -       | -     | √      | -     | -         | -       | √             | -      | -        | -     | -    | -     | -        | -        | -      | -    |
| RNF217    | 6   | -       | -     | -      | -     | -         | -       | -             | -      | -        | √     | -    | √     | -        | -        | -      | -    |
| SLC22A16  | 6   | -       | -     | √      | -     | -         | -       | -             | -      | √        | -     | -    | -     | -        | -        | -      | -    |
| SLC26A8   | 6   | -       | -     | -      | -     | -         | -       | -             | -      | -        | -     | -    | -     | -        | -        | -      | -    |
| SPACA1    | 6   | -       | -     | -      | -     | -         | -       | -             | -      | -        | -     | -    | √     | -        | -        | -      | -    |
| UST       | 6   | √       | √     | -      | √     | -         | -       | √             | -      | √        | -     | -    | -     | -        | -        | √      | √    |
| ADAM22    | 7   | √       | √     | √      | -     | -         | -       | √             | √      | -        | -     | -    | -     | √        | -        | √      | √    |

|           |    |   |   |   |   |   |   |   |   |   |   |   |   |   |   |   |   |
|-----------|----|---|---|---|---|---|---|---|---|---|---|---|---|---|---|---|---|
| C7orf45*  | 7  | - | - | - | - | - | - | √ | - | - | - | - | - | - | - | - | - |
| C7orf53   | 7  | - | - | - | - | - | - | - | - | - | - | - | - | - | √ | - | √ |
| CYP51A1   | 7  | √ | √ | √ | - | - | - | - | √ | - | √ | √ | √ | - | √ | - | - |
| OR6B1     | 7  | - | - | - | - | - | - | - | - | - | - | - | - | - | - | - | - |
| ADAM18    | 8  | - | √ | - | - | - | - | - | - | - | - | - | - | - | √ | - | - |
| ADAM2     | 8  | √ | - | - | - | - | - | √ | - | - | - | - | - | - | √ | - | - |
| ADAM7*    | 8  | - | - | - | - | - | - | - | - | - | - | - | - | - | √ | √ | - |
| CSMD1     | 8  | - | - | - | - | - | - | - | √ | √ | - | - | - | - | √ | - | - |
| RNF139    | 8  | - | √ | √ | - | - | - | √ | - | - | - | √ | - | - | √ | - | - |
| RNF19A    | 8  | √ | √ | √ | - | - | - | √ | - | - | - | - | - | - | √ | - | - |
| GRIN3A    | 9  | - | - | - | - | - | - | √ | - | - | - | - | - | - | - | - | - |
| KCNV2     | 9  | - | - | √ | - | - | - | - | - | - | - | - | - | - | - | - | - |
| C10orf57  | 10 | √ | - | - | - | - | - | - | √ | - | √ | √ | √ | √ | √ | √ | - |
| HTR7      | 10 | √ | - | - | - | - | - | √ | - | √ | - | √ | - | - | - | - | - |
| TMEM26    | 10 | - | - | - | - | - | - | - | - | - | - | - | - | - | - | - | - |
| CATSPER1  | 11 | - | - | - | - | - | - | - | - | - | - | - | - | - | - | - | - |
| CNGA4     | 11 | - | - | - | - | - | - | - | - | - | - | - | - | - | - | - | - |
| GDPD4*    | 11 | - | - | √ | - | - | - | - | - | - | - | - | - | - | - | - | - |
| MRGPRX3   | 11 | - | - | - | - | - | - | - | - | - | - | - | - | - | - | - | - |
| MS4A13*   | 11 | - | - | - | - | - | - | - | - | - | - | - | - | - | - | - | - |
| MS4A5*    | 11 | - | √ | √ | - | - | - | - | - | - | - | - | - | - | √ | - | √ |
| OR8B3     | 11 | - | - | - | - | - | - | - | - | - | - | - | - | - | - | - | - |
| PTDSS2    | 11 | - | √ | √ | - | - | - | - | √ | √ | - | √ | - | √ | √ | √ | √ |
| SNX19     | 11 | - | - | - | - | - | - | - | - | - | √ | - | - | - | - | - | - |
| ZDHHC13   | 11 | √ | √ | √ | - | - | - | - | - | √ | √ | √ | - | √ | - | - | - |
| ZP1       | 11 | - | - | - | - | - | - | - | - | - | - | - | - | - | - | - | - |
| ADIPOR2   | 12 | - | - | - | - | - | - | - | √ | - | - | - | - | - | - | - | √ |
| CLEC12B*  | 12 | - | - | √ | - | - | - | √ | - | - | - | - | - | - | - | - | - |
| CLEC1B    | 12 | - | - | √ | - | - | - | - | - | - | - | - | √ | √ | - | - | - |
| HVCN1     | 12 | - | √ | √ | - | - | - | √ | - | - | - | - | √ | - | - | - | - |
| SLC41A2   | 12 | - | √ | √ | - | - | - | √ | √ | - | - | - | - | - | - | - | - |
| TMEM116   | 12 | - | - | - | - | √ | - | - | - | √ | - | √ | - | - | - | - | - |
| TMPRSS12  | 12 | - | - | √ | - | - | - | - | - | - | - | - | - | - | - | - | - |
| C13orf16  | 13 | - | - | √ | - | - | - | - | - | - | - | - | - | - | - | - | - |
| ADAM20*   | 14 | - | - | - | - | - | - | - | - | - | - | √ | - | - | - | - | √ |
| C14orf100 | 14 | - | - | - | - | - | - | √ | - | - | - | - | - | - | √ | - | - |
| KCNK13    | 14 | - | - | √ | - | - | - | - | - | - | - | - | - | - | - | - | - |
| MDGA2     | 14 | - | - | √ | - | - | - | √ | - | √ | - | - | - | - | √ | √ | - |
| GABRG3    | 15 | - | - | √ | - | - | - | - | - | - | √ | - | - | - | √ | - | - |
| OR4N4     | 15 | - | - | - | - | - | - | - | - | - | - | - | - | - | - | - | - |
| TMCO5A    | 15 | - | - | - | - | - | - | - | - | - | - | - | - | - | - | - | - |
| CACNA1H   | 16 | - | - | - | - | - | - | - | - | - | √ | - | - | - | - | - | - |
| CMTM2     | 16 | - | - | - | - | - | - | - | - | - | - | - | - | - | - | - | - |
| KCNG4     | 16 | - | - | - | √ | - | - | - | - | - | - | - | - | - | - | - | - |
| SLC38A7   | 16 | √ | √ | √ | - | √ | - | - | √ | √ | √ | √ | - | - | - | - | √ |
| TMC5      | 16 | √ | - | - | - | √ | - | - | - | √ | - | √ | √ | √ | √ | √ | - |
| FLJ35773* | 17 | - | - | - | - | - | - | - | - | - | - | - | - | - | - | - | - |
| TMEM95    | 17 | - | - | √ | - | - | - | - | - | - | - | - | - | - | - | - | - |
| PIGN      | 18 | - | - | - | - | - | - | - | √ | √ | √ | - | - | - | √ | - | - |
| ATP8B3    | 19 | - | - | - | - | - | - | √ | - | - | - | - | - | - | - | - | - |
| C19orf15  | 19 | - | - | √ | - | - | - | - | - | - | - | - | - | - | - | - | - |
| C19orf41* | 19 | - | - | - | - | - | - | - | - | - | - | - | - | - | - | - | - |
| CACNG8    | 19 | - | - | - | - | - | - | - | - | - | - | - | - | - | - | √ | - |
| CD320     | 19 | - | √ | - | √ | - | - | - | √ | - | √ | - | - | √ | - | - | √ |
| IZUMO1    | 19 | - | - | - | - | - | - | - | - | - | - | - | - | - | - | - | - |
| MAG       | 19 | √ | - | - | - | - | - | - | √ | - | √ | - | √ | - | √ | - | √ |

|           |    |   |   |   |   |   |   |   |   |   |   |   |   |   |   |   |
|-----------|----|---|---|---|---|---|---|---|---|---|---|---|---|---|---|---|
| NCLN      | 19 | √ | √ | - | - | √ | - | √ | - | - | √ | - | - | √ | √ | √ |
| SLC6A16   | 19 | - | √ | - | - | - | - | - | - | - | - | - | - | - | - | - |
| ZNRF4*    | 19 | - | √ | - | - | - | - | - | - | - | - | √ | - | - | - | - |
| C20orf106 | 20 | - | - | - | - | - | - | - | - | - | - | - | - | - | - | - |
| C20orf107 | 20 | - | - | - | - | - | - | - | - | - | - | - | - | - | - | - |
| C20orf54  | 20 | - | - | - | - | - | - | - | - | - | - | - | √ | - | - | - |
| LRRC3     | 21 | √ | - | - | - | - | - | - | - | - | - | - | √ | - | - | - |
| TPTE      | 21 | - | - | - | - | - | - | - | - | - | - | - | - | √ | - | √ |
| ACE2      | X  | - | - | √ | - | - | - | √ | - | - | - | √ | - | - | - | - |
| FATE1     | X  | - | - | - | √ | - | - | - | √ | - | - | - | - | √ | - | - |
| FMR1NB*   | X  | - | - | √ | - | - | - | - | - | - | - | - | - | - | - | - |
| GPR64     | X  | - | - | - | √ | - | - | - | - | √ | - | √ | - | - | - | - |
| IL13RA2   | X  | - | √ | - | √ | √ | - | √ | - | - | - | - | - | - | - | √ |
| TMEM31*   | X  | - | - | - | - | - | - | - | √ | - | - | - | - | - | - | √ |
| TRPC5     | X  | - | - | √ | - | - | - | √ | - | - | - | - | - | - | - | - |
| VSIG1     | X  | - | - | - | - | - | - | - | - | √ | - | - | - | - | - | - |

Asterisk (\*) indicates genes with a restricted expression in testis according to UNIGENE

√ means over expression in tumor samples when compared with the corresponding normal samples with  $p < 0,01$
